# Supplementary material for: Fostering collective climate action and leadership: Insights from a pilot experiment involving mindfulness and compassion
Source: PubMed Central journal article supplement (PMC10040966; doi:10.1016/j.isci.2023.106191), 2023-02-24

**iScience, Volume 26**

**Supplemental information**

**Fostering collective climate action and leadership:**

**Insights from a pilot experiment involving**

**mindfulness and compassion**

**Lena Ramstetter, Silke Rupperecht, Luis Mundaca, Walter Osika, Cecilia U.D. Stenfors, Johannes Klackl, and Christine Wamsler**

# Supplemental information

## 1 Survey

### Data S1. Questionnaire. Related to STAR Methods

This survey helps you reflect on the linkage between mindset and environmental behaviour. It is part of a collaboration between the [REDACTED] and research from [REDACTED]. Survey completion takes approximately 10-15 minutes. The anonymous data will be analysed by [REDACTED]. Read the data privacy policy here. For more information about the [REDACTED]

First, please create your personal code. This code is extremely important to match your data across time points. Please save this code and/or create it according to the instructions below.

The code consists of five characters and is structured as follows: First two letters of your mother's first name (e.g. EM for Emma). Second numeral of your mother's day of birth (e.g. 6 for a birthday on January 06). First two letters of your father's first name (e.g. PE for Peter). The sample code would be EM6PE. Please enter your 5-digit personal code here:

Please enter your Project ID (e.g., E20-ABC-000, you can find it in your welcome letter)

First, please answer some demographic questions.

Your age

1. Under 18
2. 18-24
3. 25-34
4. 35-44
5. 45-54
6. 55-64
7. Over 64

Your gender

1. Female
2. Male
3. Other

Your highest education level

1. Primary and/or secondary school
2. High school
3. Bachelor's degree
4. Technical/Vocational degree
5. Master's degree
6. Postgraduate degree

Which best describes your professional role/ position?

1. Policymaker
2. Leader/ manager
3. Academic/ researcher
4. Advocate/ campaigner
5. Innovator/ entrepreneur

6. Writer/ thinker /communicator
7. Other \_\_\_\_\_

Which area do you work in primarily?

1. Parliament or other legislature
2. Public sector
3. Private sector
4. Non-governmental organisations
5. Education/ Academic sector

At what level do you mainly work?

1. Global level
2. EU level (or another cross-country region)
3. National level
4. Regional or local level (e.g. city)

Next, please reflect on your level of experience with mindfulness and other techniques.

Have you practiced some of the following techniques in the past?

|                                                                                        | Yes                      | No                       |
|----------------------------------------------------------------------------------------|--------------------------|--------------------------|
| Moving meditation (such as Yoga, TaiChi, Qi gong, walking meditation).                 | <input type="checkbox"/> | <input type="checkbox"/> |
| Relaxation meditation (such as body scan, breathing or related mindfulness exercises). | <input type="checkbox"/> | <input type="checkbox"/> |
| Insight meditation (such as compassion, kindness or related mindfulness exercises).    | <input type="checkbox"/> | <input type="checkbox"/> |

Are you currently practicing some of these techniques?

|                                                                                        | No                       | Yes, several times per year | Yes, several times per month | Yes, several times per week | Yes, daily               |
|----------------------------------------------------------------------------------------|--------------------------|-----------------------------|------------------------------|-----------------------------|--------------------------|
| Moving meditation (such as Yoga, TaiChi, Qi gong, walking meditation).                 | <input type="checkbox"/> | <input type="checkbox"/>    | <input type="checkbox"/>     | <input type="checkbox"/>    | <input type="checkbox"/> |
| Relaxation meditation (such as body scan, breathing or related mindfulness exercises). | <input type="checkbox"/> | <input type="checkbox"/>    | <input type="checkbox"/>     | <input type="checkbox"/>    | <input type="checkbox"/> |
| Insight meditation (such as compassion, kindness or related mindfulness exercises).    | <input type="checkbox"/> | <input type="checkbox"/>    | <input type="checkbox"/>     | <input type="checkbox"/>    | <input type="checkbox"/> |

For how long have you been practicing the indicated techniques in the past (Please answer independently if you still practice or not).

1. Less than 1 year
2. 1-5 years
3. 5-10 years
4. More than 10 years
5. More than 20 years
6. Does not apply

Please choose the answer that best reflects your experience in the past month.

Below is a collection of statements about your everyday experience. Please indicate how frequently or infrequently you have had each experience in the past month. Please answer according to what really reflects your experience rather than what you think your experience should be.

|                                                                                               | Never or very rarely true | Rarely true              | Sometimes true           | Often true               | Very often or always true |
|-----------------------------------------------------------------------------------------------|---------------------------|--------------------------|--------------------------|--------------------------|---------------------------|
| In the past month, I felt difficulties were piling up so high that I could not overcome them. | <input type="checkbox"/>  | <input type="checkbox"/> | <input type="checkbox"/> | <input type="checkbox"/> | <input type="checkbox"/>  |
| In general, I think that I can obtain outcomes that are important to me.                      | <input type="checkbox"/>  | <input type="checkbox"/> | <input type="checkbox"/> | <input type="checkbox"/> | <input type="checkbox"/>  |
| I feel hopeful for the future.                                                                | <input type="checkbox"/>  | <input type="checkbox"/> | <input type="checkbox"/> | <input type="checkbox"/> | <input type="checkbox"/>  |

Please choose the response that best represents how often you have experienced or felt the following during the past month. How often have you felt ...

|                                                                                  | Never                    | Once or twice            | About once a week        | About 2 or 3 times a week | Almost every day         | Every day                |
|----------------------------------------------------------------------------------|--------------------------|--------------------------|--------------------------|---------------------------|--------------------------|--------------------------|
| ... happy with life                                                              | <input type="checkbox"/> | <input type="checkbox"/> | <input type="checkbox"/> | <input type="checkbox"/>  | <input type="checkbox"/> | <input type="checkbox"/> |
| ... satisfied with life                                                          | <input type="checkbox"/> | <input type="checkbox"/> | <input type="checkbox"/> | <input type="checkbox"/>  | <input type="checkbox"/> | <input type="checkbox"/> |
| ... that you had something important to contribute to society                    | <input type="checkbox"/> | <input type="checkbox"/> | <input type="checkbox"/> | <input type="checkbox"/>  | <input type="checkbox"/> | <input type="checkbox"/> |
| ... that you belonged to a community (like a social group, or your neighborhood) | <input type="checkbox"/> | <input type="checkbox"/> | <input type="checkbox"/> | <input type="checkbox"/>  | <input type="checkbox"/> | <input type="checkbox"/> |
| ... that you had warm and trusting relationships with others                     | <input type="checkbox"/> | <input type="checkbox"/> | <input type="checkbox"/> | <input type="checkbox"/>  | <input type="checkbox"/> | <input type="checkbox"/> |
| ... that your life has a sense of direction or meaning to it                     | <input type="checkbox"/> | <input type="checkbox"/> | <input type="checkbox"/> | <input type="checkbox"/>  | <input type="checkbox"/> | <input type="checkbox"/> |

Please let us know about your experience with sustainability or climate change related issues

Do you work in sustainability and/or climate change related issues?

1. Yes
2. No

If yes, please specify (field of work, focus):

---

Please mark/ select the statements you most agree with

The most important thing in my life is ...

1. To be successful and have people recognize my achievements
2. To be of service to my family, community and/or country
3. To do things my own way and forge my own path in life
4. To support my own and others' inner potential in the service of humanity

To what extent do you stand up for climate action and/or seek to make sustainability central to your organisation?

1. Fully
2. To a great extent
3. Partly
4. To a low extent
5. Not at all

To what extent are climate issues considered/ integrated in your current work, and particularly ....

|                                                                                                        | Fully                    | To a great extent        | Partly                   | To a low extent          | Not at all               | Does not apply           |
|--------------------------------------------------------------------------------------------------------|--------------------------|--------------------------|--------------------------|--------------------------|--------------------------|--------------------------|
| ... the type of activities/ projects you are involved in?                                              | <input type="checkbox"/> | <input type="checkbox"/> | <input type="checkbox"/> | <input type="checkbox"/> | <input type="checkbox"/> | <input type="checkbox"/> |
| ... your department/unit's field of operations (activities, projects, production processes)?           | <input type="checkbox"/> | <input type="checkbox"/> | <input type="checkbox"/> | <input type="checkbox"/> | <input type="checkbox"/> | <input type="checkbox"/> |
| ... the strategic priorities, aims and/or vision of your department/unit?                              | <input type="checkbox"/> | <input type="checkbox"/> | <input type="checkbox"/> | <input type="checkbox"/> | <input type="checkbox"/> | <input type="checkbox"/> |
| ... your department/unit's internal regulations and policies?                                          | <input type="checkbox"/> | <input type="checkbox"/> | <input type="checkbox"/> | <input type="checkbox"/> | <input type="checkbox"/> | <input type="checkbox"/> |
| ... the planning, monitoring and evaluation tools you use?                                             | <input type="checkbox"/> | <input type="checkbox"/> | <input type="checkbox"/> | <input type="checkbox"/> | <input type="checkbox"/> | <input type="checkbox"/> |
| ... offered training, learning & development activities?                                               | <input type="checkbox"/> | <input type="checkbox"/> | <input type="checkbox"/> | <input type="checkbox"/> | <input type="checkbox"/> | <input type="checkbox"/> |
| ... internal working structures (e.g. groups or staff mandated to integrate the issue across sectors)? | <input type="checkbox"/> | <input type="checkbox"/> | <input type="checkbox"/> | <input type="checkbox"/> | <input type="checkbox"/> | <input type="checkbox"/> |
| ... strategic cooperation with external stakeholders?                                                  | <input type="checkbox"/> | <input type="checkbox"/> | <input type="checkbox"/> | <input type="checkbox"/> | <input type="checkbox"/> | <input type="checkbox"/> |
| ... budget allocations (financial resources)?                                                          | <input type="checkbox"/> | <input type="checkbox"/> | <input type="checkbox"/> | <input type="checkbox"/> | <input type="checkbox"/> | <input type="checkbox"/> |
| ... human resource allocations?                                                                        | <input type="checkbox"/> | <input type="checkbox"/> | <input type="checkbox"/> | <input type="checkbox"/> | <input type="checkbox"/> | <input type="checkbox"/> |

What is your level of influence on ...

|                                                                                                        | Very high                | Relatively high          | Moderate                 | Relatively low           | Very low                 |
|--------------------------------------------------------------------------------------------------------|--------------------------|--------------------------|--------------------------|--------------------------|--------------------------|
| ... the type of activities/ projects you are involved in?                                              | <input type="checkbox"/> | <input type="checkbox"/> | <input type="checkbox"/> | <input type="checkbox"/> | <input type="checkbox"/> |
| ... your department/unit's field of operations (activities, projects, production processes)?           | <input type="checkbox"/> | <input type="checkbox"/> | <input type="checkbox"/> | <input type="checkbox"/> | <input type="checkbox"/> |
| ... the strategic priorities, aims and/or vision of your department/unit?                              | <input type="checkbox"/> | <input type="checkbox"/> | <input type="checkbox"/> | <input type="checkbox"/> | <input type="checkbox"/> |
| ... your department/unit's internal regulations and policies?                                          | <input type="checkbox"/> | <input type="checkbox"/> | <input type="checkbox"/> | <input type="checkbox"/> | <input type="checkbox"/> |
| ... the planning, monitoring and evaluation tools you use?                                             | <input type="checkbox"/> | <input type="checkbox"/> | <input type="checkbox"/> | <input type="checkbox"/> | <input type="checkbox"/> |
| ... offered training, learning & development activities?                                               | <input type="checkbox"/> | <input type="checkbox"/> | <input type="checkbox"/> | <input type="checkbox"/> | <input type="checkbox"/> |
| ... internal working structures (e.g. groups or staff mandated to integrate the issue across sectors)? | <input type="checkbox"/> | <input type="checkbox"/> | <input type="checkbox"/> | <input type="checkbox"/> | <input type="checkbox"/> |
| ... strategic cooperation with external stakeholders?                                                  | <input type="checkbox"/> | <input type="checkbox"/> | <input type="checkbox"/> | <input type="checkbox"/> | <input type="checkbox"/> |
| ... budget allocations (financial resources)?                                                          | <input type="checkbox"/> | <input type="checkbox"/> | <input type="checkbox"/> | <input type="checkbox"/> | <input type="checkbox"/> |
| ... human resource allocations?                                                                        | <input type="checkbox"/> | <input type="checkbox"/> | <input type="checkbox"/> | <input type="checkbox"/> | <input type="checkbox"/> |

To what extent do you intend to integrate climate issues more in your work over the next 12 months?

1. No specific intentions/ plans at this point
2. Integrate fully – as much as possible
3. Integrate to a great extent
4. Integrate partly
5. Integrate to a low extent
6. Not relevant for my organisation

Please tell us for each of the following statements how much you agree or disagree

|                                                                                                                                                                       | agree strongly           | agree to some extent     | neutral/ neither agree nor disagree | disagree to some extent  | disagree strongly        |
|-----------------------------------------------------------------------------------------------------------------------------------------------------------------------|--------------------------|--------------------------|-------------------------------------|--------------------------|--------------------------|
| I see myself as an environmentally-friendly person.                                                                                                                   | <input type="checkbox"/> | <input type="checkbox"/> | <input type="checkbox"/>            | <input type="checkbox"/> | <input type="checkbox"/> |
| I do not see a big conflict between how environmentally friendly I want to live and how I actually live.                                                              | <input type="checkbox"/> | <input type="checkbox"/> | <input type="checkbox"/>            | <input type="checkbox"/> | <input type="checkbox"/> |
| If we continue like this, we will head for a climate/ an environmental catastrophe.                                                                                   | <input type="checkbox"/> | <input type="checkbox"/> | <input type="checkbox"/>            | <input type="checkbox"/> | <input type="checkbox"/> |
| I often feel worry when I think about climate and environmental problems. By "worry" we mean that it is something that weighs you down or makes you feel overwhelmed. | <input type="checkbox"/> | <input type="checkbox"/> | <input type="checkbox"/>            | <input type="checkbox"/> | <input type="checkbox"/> |
| It makes me sad when I think about the loss of species and territories due to global warming.                                                                         | <input type="checkbox"/> | <input type="checkbox"/> | <input type="checkbox"/>            | <input type="checkbox"/> | <input type="checkbox"/> |
| It is just too difficult for someone like me to do much about the environment.                                                                                        | <input type="checkbox"/> | <input type="checkbox"/> | <input type="checkbox"/>            | <input type="checkbox"/> | <input type="checkbox"/> |
| Modern science will solve our environmental problems with little change to our way of living.                                                                         | <input type="checkbox"/> | <input type="checkbox"/> | <input type="checkbox"/>            | <input type="checkbox"/> | <input type="checkbox"/> |
| There need to be stricter laws and regulations to protect the environment.                                                                                            | <input type="checkbox"/> | <input type="checkbox"/> | <input type="checkbox"/>            | <input type="checkbox"/> | <input type="checkbox"/> |
| In order to protect the environment the country needs economic growth.                                                                                                | <input type="checkbox"/> | <input type="checkbox"/> | <input type="checkbox"/>            | <input type="checkbox"/> | <input type="checkbox"/> |
| We worry too much about the future of the environment and not enough about prices and jobs.                                                                           | <input type="checkbox"/> | <input type="checkbox"/> | <input type="checkbox"/>            | <input type="checkbox"/> | <input type="checkbox"/> |
| I do not see a big conflict between a good quality life and a sustainable life.                                                                                       | <input type="checkbox"/> | <input type="checkbox"/> | <input type="checkbox"/>            | <input type="checkbox"/> | <input type="checkbox"/> |
| I do what is good for the climate/ environment even if this costs me more money or time.                                                                              | <input type="checkbox"/> | <input type="checkbox"/> | <input type="checkbox"/>            | <input type="checkbox"/> | <input type="checkbox"/> |
| I would feel guilty if I did not participate in actions to protect the environment/ address climate change.                                                           | <input type="checkbox"/> | <input type="checkbox"/> | <input type="checkbox"/>            | <input type="checkbox"/> | <input type="checkbox"/> |
| I feel morally obliged to participate in actions to protect the environment/ address climate change.                                                                  | <input type="checkbox"/> | <input type="checkbox"/> | <input type="checkbox"/>            | <input type="checkbox"/> | <input type="checkbox"/> |

Please tell us for each of the following statements how much you agree or disagree. Have you done any of the following in the past two months for environmental reasons?

|                                                                                              | never or very rarely     | rarely                   | sometimes                | often                    | very often or always     |
|----------------------------------------------------------------------------------------------|--------------------------|--------------------------|--------------------------|--------------------------|--------------------------|
| Reduce car transport.                                                                        | <input type="checkbox"/> | <input type="checkbox"/> | <input type="checkbox"/> | <input type="checkbox"/> | <input type="checkbox"/> |
| Cut down on the amount I fly (e.g. no transatlantic and short-distance flights).             | <input type="checkbox"/> | <input type="checkbox"/> | <input type="checkbox"/> | <input type="checkbox"/> | <input type="checkbox"/> |
| Use public transportation whenever possible.                                                 | <input type="checkbox"/> | <input type="checkbox"/> | <input type="checkbox"/> | <input type="checkbox"/> | <input type="checkbox"/> |
| Walk or cycle for non-recreational purposes.                                                 | <input type="checkbox"/> | <input type="checkbox"/> | <input type="checkbox"/> | <input type="checkbox"/> | <input type="checkbox"/> |
| Adopt a vegetarian diet.                                                                     | <input type="checkbox"/> | <input type="checkbox"/> | <input type="checkbox"/> | <input type="checkbox"/> | <input type="checkbox"/> |
| Adopt a vegan diet.                                                                          | <input type="checkbox"/> | <input type="checkbox"/> | <input type="checkbox"/> | <input type="checkbox"/> | <input type="checkbox"/> |
| Buy/ eat organic food.                                                                       | <input type="checkbox"/> | <input type="checkbox"/> | <input type="checkbox"/> | <input type="checkbox"/> | <input type="checkbox"/> |
| Reduce material consumption (e.g. reusing, less clothes/ electronics, minimalist lifestyle). | <input type="checkbox"/> | <input type="checkbox"/> | <input type="checkbox"/> | <input type="checkbox"/> | <input type="checkbox"/> |
| Minimize waste (e.g. food, packaging).                                                       | <input type="checkbox"/> | <input type="checkbox"/> | <input type="checkbox"/> | <input type="checkbox"/> | <input type="checkbox"/> |
| Take measures to be less affected/ more prepared for climate impacts.                        | <input type="checkbox"/> | <input type="checkbox"/> | <input type="checkbox"/> | <input type="checkbox"/> | <input type="checkbox"/> |
| Write a letter/email or signing a petition for supporting an environmental issue.            | <input type="checkbox"/> | <input type="checkbox"/> | <input type="checkbox"/> | <input type="checkbox"/> | <input type="checkbox"/> |
| Take part in a social movements/ protest about an environmental issue.                       | <input type="checkbox"/> | <input type="checkbox"/> | <input type="checkbox"/> | <input type="checkbox"/> | <input type="checkbox"/> |
| Vote or support environmentally-oriented political candidates/ parties.                      | <input type="checkbox"/> | <input type="checkbox"/> | <input type="checkbox"/> | <input type="checkbox"/> | <input type="checkbox"/> |
| Support environmental organizations/ groups (e.g. through donations or volunteering).        | <input type="checkbox"/> | <input type="checkbox"/> | <input type="checkbox"/> | <input type="checkbox"/> | <input type="checkbox"/> |
| Be an active member in an environmental organization.                                        | <input type="checkbox"/> | <input type="checkbox"/> | <input type="checkbox"/> | <input type="checkbox"/> | <input type="checkbox"/> |
| Actively spread awareness (e.g. through social media or other means).                        | <input type="checkbox"/> | <input type="checkbox"/> | <input type="checkbox"/> | <input type="checkbox"/> | <input type="checkbox"/> |
| Create initiatives that addresses specific environmental needs/ challenges.                  | <input type="checkbox"/> | <input type="checkbox"/> | <input type="checkbox"/> | <input type="checkbox"/> | <input type="checkbox"/> |

Have you done any of the following in the past two months for environmental reasons?

|                                                                              | Yes                      | No                       |
|------------------------------------------------------------------------------|--------------------------|--------------------------|
| Live car-free.                                                               | <input type="checkbox"/> | <input type="checkbox"/> |
| Use a battery electric car.                                                  | <input type="checkbox"/> | <input type="checkbox"/> |
| Refurbish or renovate to reduce energy consumption.                          | <input type="checkbox"/> | <input type="checkbox"/> |
| Produce your own renewable electricity (e.g., solar PV).                     | <input type="checkbox"/> | <input type="checkbox"/> |
| Buy electricity generated with renewable energy sources (e.g., wind, solar). | <input type="checkbox"/> | <input type="checkbox"/> |

## 2 Descriptives by group

**Table S1. Sociodemographic Characteristics of the Final Sample (N=94). Related to STAR Methods**

| Variable                        | N  | Overall<br>(N = 94) <sup>l</sup> | Control<br>(N = 29) <sup>l</sup> | Intervention<br>(N = 65) <sup>l</sup> | p-value <sup>2</sup> |
|---------------------------------|----|----------------------------------|----------------------------------|---------------------------------------|----------------------|
| <b>Gender</b>                   | 94 |                                  |                                  |                                       | 0.5                  |
| Female                          |    | 68 (72%)                         | 23 (79%)                         | 45 (69%)                              |                      |
| Male                            |    | 26 (28%)                         | 6 (21%)                          | 20 (31%)                              |                      |
| <b>Age</b>                      | 94 |                                  |                                  |                                       | 0.024                |
| 25-34                           |    | 21 (22%)                         | 11 (38%)                         | 10 (15%)                              |                      |
| 35-44                           |    | 23 (24%)                         | 9 (31%)                          | 14 (22%)                              |                      |
| 45-54                           |    | 35 (37%)                         | 5 (17%)                          | 30 (46%)                              |                      |
| 55-64                           |    | 14 (15%)                         | 4 (14%)                          | 10 (15%)                              |                      |
| Over 64                         |    | 1 (1.1%)                         | 0 (0%)                           | 1 (1.5%)                              |                      |
| <b>Education</b>                | 94 |                                  |                                  |                                       | 0.089                |
| High School                     |    | 2 (2.1%)                         | 2 (6.9%)                         | 0 (0%)                                |                      |
| Bachelor's degree               |    | 15 (16%)                         | 6 (21%)                          | 9 (14%)                               |                      |
| Technical/Vocational degree     |    | 1 (1.1%)                         | 1 (3.4%)                         | 0 (0%)                                |                      |
| Master's degree                 |    | 55 (59%)                         | 14 (48%)                         | 41 (63%)                              |                      |
| Postgraduate degree             |    | 21 (22%)                         | 6 (21%)                          | 15 (23%)                              |                      |
| <b>Area of work</b>             | 94 |                                  |                                  |                                       | 0.3                  |
| Parliament or other legislature |    | 2 (2.1%)                         | 1 (3.4%)                         | 1 (1.5%)                              |                      |
| Public sector                   |    | 44 (47%)                         | 15 (52%)                         | 29 (45%)                              |                      |
| Private sector                  |    | 39 (41%)                         | 13 (45%)                         | 26 (40%)                              |                      |
| Non-governmental organisations  |    | 6 (6.4%)                         | 0 (0%)                           | 6 (9.2%)                              |                      |
| Education/Academic sector       |    | 3 (3.2%)                         | 0 (0%)                           | 3 (4.6%)                              |                      |
| <b>Role at work</b>             | 94 |                                  |                                  |                                       | <0.001               |
| Policymaker                     |    | 6 (6.4%)                         | 5 (17%)                          | 1 (1.5%)                              |                      |
| Leader/manager                  |    | 42 (45%)                         | 5 (17%)                          | 37 (57%)                              |                      |
| Academic/ researcher            |    | 6 (6.4%)                         | 3 (10%)                          | 3 (4.6%)                              |                      |
| Advocate/campaigner             |    | 4 (4.3%)                         | 3 (10%)                          | 1 (1.5%)                              |                      |
| Innovater/entrepreneur          |    | 5 (5.3%)                         | 0 (0%)                           | 5 (7.7%)                              |                      |
| Writer/thinker/communicator     |    | 10 (11%)                         | 4 (14%)                          | 6 (9.2%)                              |                      |
| other                           |    | 21 (22%)                         | 9 (31%)                          | 12 (18%)                              |                      |
| <b>Level of work</b>            | 94 |                                  |                                  |                                       | 0.10                 |
| Global level                    |    | 36 (38%)                         | 8 (28%)                          | 28 (43%)                              |                      |



|                                            |          |          |          |
|--------------------------------------------|----------|----------|----------|
| EU level (or another cross-country region) | 49 (52%) | 16 (55%) | 33 (51%) |
| National level                             | 7 (7.4%) | 3 (10%)  | 4 (6.2%) |
| Regional or local level (e.g., city)       | 2 (2.1%) | 2 (6.9%) | 0 (0%)   |

<sup>1</sup> Mean (SD); n (%)

<sup>2</sup> Wilcoxon rank sum test; Fisher's exact test

**Table S2. Descriptive statistics by group (complete). Related to STAR Methods**

|                     | Control<br>(N=29) | Intervention<br>(N=65) | Overall<br>(N=94) | P-value |
|---------------------|-------------------|------------------------|-------------------|---------|
| <b>t1_Age</b>       |                   |                        |                   |         |
| Mean (SD)           | 4.07 (1.07)       | 4.66 (0.973)           | 4.48 (1.03)       | 0.0357  |
| Median [Min, Max]   | 4.00 [3.00, 6.00] | 5.00 [3.00, 7.00]      | 5.00 [3.00, 7.00] |         |
| <b>female</b>       |                   |                        |                   |         |
| 1                   | 23 (79.3%)        | 45 (69.2%)             | 68 (72.3%)        | NA      |
| 0                   | 6 (20.7%)         | 20 (30.8%)             | 26 (27.7%)        |         |
| <b>t1_Edu</b>       |                   |                        |                   |         |
| Mean (SD)           | 4.55 (1.24)       | 4.95 (0.891)           | 4.83 (1.02)       | 0.211   |
| Median [Min, Max]   | 5.00 [2.00, 6.00] | 5.00 [3.00, 6.00]      | 5.00 [2.00, 6.00] |         |
| <b>t1_Role</b>      |                   |                        |                   |         |
| Mean (SD)           | 4.24 (2.42)       | 3.58 (2.11)            | 3.79 (2.22)       | 0.416   |
| Median [Min, Max]   | 4.00 [1.00, 7.00] | 2.00 [1.00, 7.00]      | 2.00 [1.00, 7.00] |         |
| <b>t1_Area</b>      |                   |                        |                   |         |
| Mean (SD)           | 2.41 (0.568)      | 2.71 (0.843)           | 2.62 (0.777)      | 0.238   |
| Median [Min, Max]   | 2.00 [1.00, 3.00] | 3.00 [1.00, 5.00]      | 3.00 [1.00, 5.00] |         |
| <b>t1_Level</b>     |                   |                        |                   |         |
| Mean (SD)           | 1.97 (0.823)      | 1.63 (0.601)           | 1.73 (0.691)      | 0.0932  |
| Median [Min, Max]   | 2.00 [1.00, 4.00] | 2.00 [1.00, 3.00]      | 2.00 [1.00, 4.00] |         |
| <b>intervention</b> |                   |                        |                   |         |
| 0                   | 29 (100%)         | 0 (0%)                 | 29 (30.9%)        | <0.001  |
| 1                   | 0 (0%)            | 65 (100%)              | 65 (69.1%)        |         |
| <b>course</b>       |                   |                        |                   |         |
| Control_active      | 14 (48.3%)        | 0 (0%)                 | 14 (14.9%)        | <0.001  |
| Control_waitlist    | 15 (51.7%)        | 0 (0%)                 | 15 (16.0%)        |         |

|                   | Control<br>(N=29) | Intervention<br>(N=65) | Overall<br>(N=94) | P-value |
|-------------------|-------------------|------------------------|-------------------|---------|
| Awaris            | 0 (0%)            | 19 (29.2%)             | 19 (20.2%)        |         |
| EU                | 0 (0%)            | 29 (44.6%)             | 29 (30.9%)        |         |
| Lanxess           | 0 (0%)            | 17 (26.2%)             | 17 (18.1%)        |         |
| t1_PID            |                   |                        |                   |         |
| D21-CTR-001       | 4 (13.8%)         | 0 (0%)                 | 4 (4.3%)          | <0.001  |
| D21-EUC-076       | 14 (48.3%)        | 0 (0%)                 | 14 (14.9%)        |         |
| D21-LAX-083       | 11 (37.9%)        | 0 (0%)                 | 11 (11.7%)        |         |
| D21AWA054         | 0 (0%)            | 6 (9.2%)               | 6 (6.4%)          |         |
| D21AWA066         | 0 (0%)            | 13 (20.0%)             | 13 (13.8%)        |         |
| D21EUC008         | 0 (0%)            | 29 (44.6%)             | 29 (30.9%)        |         |
| D21LAX010         | 0 (0%)            | 17 (26.2%)             | 17 (18.1%)        |         |
| t2_PID            |                   |                        |                   |         |
| D21-CTR-001       | 4 (13.8%)         | 0 (0%)                 | 4 (4.3%)          | <0.001  |
| D21-EUC-076       | 14 (48.3%)        | 0 (0%)                 | 14 (14.9%)        |         |
| D21-LAX-083       | 11 (37.9%)        | 0 (0%)                 | 11 (11.7%)        |         |
| D21AWA054         | 0 (0%)            | 6 (9.2%)               | 6 (6.4%)          |         |
| D21AWA066         | 0 (0%)            | 13 (20.0%)             | 13 (13.8%)        |         |
| D21EUC008         | 0 (0%)            | 29 (44.6%)             | 29 (30.9%)        |         |
| D21LAX010         | 0 (0%)            | 17 (26.2%)             | 17 (18.1%)        |         |
| t1_PEAtt_1r       |                   |                        |                   |         |
| Mean (SD)         | 4.34 (0.670)      | 4.25 (0.685)           | 4.28 (0.678)      | 0.81    |
| Median [Min, Max] | 4.00 [3.00, 5.00] | 4.00 [2.00, 5.00]      | 4.00 [2.00, 5.00] |         |
| t1_PEAtt_2        |                   |                        |                   |         |
| Mean (SD)         | 2.76 (1.18)       | 2.95 (1.11)            | 2.89 (1.13)       | 0.743   |
| Median [Min, Max] | 3.00 [1.00, 5.00] | 3.00 [1.00, 5.00]      | 3.00 [1.00, 5.00] |         |
| t1_PEAtt_3r       |                   |                        |                   |         |
| Mean (SD)         | 4.52 (0.634)      | 4.68 (0.562)           | 4.63 (0.586)      | 0.476   |
| Median [Min, Max] | 5.00 [3.00, 5.00] | 5.00 [3.00, 5.00]      | 5.00 [3.00, 5.00] |         |
| t1_PEAtt_4r       |                   |                        |                   |         |
| Mean (SD)         | 3.48 (1.33)       | 3.82 (1.06)            | 3.71 (1.15)       | 0.433   |
| Median [Min, Max] | 4.00 [1.00, 5.00] | 4.00 [1.00, 5.00]      | 4.00 [1.00, 5.00] |         |
| t1_PEAtt_5r       |                   |                        |                   |         |
| Mean (SD)         | 4.38 (0.942)      | 4.72 (0.545)           | 4.62 (0.705)      | 0.0905  |

|                   | Control<br>(N=29) |        | Intervention<br>(N=65) |        | Overall<br>(N=94) |        | P-value |
|-------------------|-------------------|--------|------------------------|--------|-------------------|--------|---------|
| Median [Min, Max] | 5.00<br>5.00]     | [1.00, | 5.00<br>5.00]          | [3.00, | 5.00<br>5.00]     | [1.00, |         |
| t1_PEAAtt_6       |                   |        |                        |        |                   |        |         |
| Mean (SD)         | 3.62 (1.12)       |        | 3.69 (1.03)            |        | 3.67 (1.05)       |        | 0.955   |
| Median [Min, Max] | 4.00<br>5.00]     | [1.00, | 4.00<br>5.00]          | [2.00, | 4.00<br>5.00]     | [1.00, |         |
| t1_PEAAtt_7       |                   |        |                        |        |                   |        |         |
| Mean (SD)         | 4.03 (0.731)      |        | 4.15 (0.988)           |        | 4.12 (0.914)      |        | 0.844   |
| Median [Min, Max] | 4.00<br>5.00]     | [3.00, | 4.00<br>5.00]          | [1.00, | 4.00<br>5.00]     | [1.00, |         |
| t1_PEAAtt_8r      |                   |        |                        |        |                   |        |         |
| Mean (SD)         | 4.38 (0.775)      |        | 4.60 (0.494)           |        | 4.53 (0.599)      |        | 0.256   |
| Median [Min, Max] | 5.00<br>5.00]     | [2.00, | 5.00<br>5.00]          | [4.00, | 5.00<br>5.00]     | [2.00, |         |
| t1_PEAAtt_9       |                   |        |                        |        |                   |        |         |
| Mean (SD)         | 3.10 (0.976)      |        | 3.58 (1.07)            |        | 3.43 (1.06)       |        | 0.132   |
| Median [Min, Max] | 3.00<br>5.00]     | [1.00, | 4.00<br>5.00]          | [1.00, | 3.00<br>5.00]     | [1.00, |         |
| Missing           | 0 (0%)            |        | 1 (1.5%)               |        | 1 (1.1%)          |        |         |
| t1_PEAAtt_10      |                   |        |                        |        |                   |        |         |
| Mean (SD)         | 4.00 (0.926)      |        | 4.35 (0.765)           |        | 4.24 (0.830)      |        | 0.171   |
| Median [Min, Max] | 4.00<br>5.00]     | [2.00, | 5.00<br>5.00]          | [2.00, | 4.00<br>5.00]     | [2.00, |         |
| Missing           | 0 (0%)            |        | 2 (3.1%)               |        | 2 (2.1%)          |        |         |
| t1_PEAAtt_11r     |                   |        |                        |        |                   |        |         |
| Mean (SD)         | 3.55 (1.12)       |        | 4.11 (0.986)           |        | 3.93 (1.06)       |        | 0.0602  |
| Median [Min, Max] | 4.00<br>5.00]     | [1.00, | 4.00<br>5.00]          | [1.00, | 4.00<br>5.00]     | [1.00, |         |
| Missing           | 0 (0%)            |        | 2 (3.1%)               |        | 2 (2.1%)          |        |         |
| t1_PEAAtt_12r     |                   |        |                        |        |                   |        |         |
| Mean (SD)         | 3.79 (0.620)      |        | 4.00 (0.873)           |        | 3.94 (0.805)      |        | 0.518   |
| Median [Min, Max] | 4.00<br>5.00]     | [3.00, | 4.00<br>5.00]          | [1.00, | 4.00<br>5.00]     | [1.00, |         |
| Missing           | 0 (0%)            |        | 1 (1.5%)               |        | 1 (1.1%)          |        |         |
| t1_PEAAtt_13r     |                   |        |                        |        |                   |        |         |
| Mean (SD)         | 3.76 (0.872)      |        | 3.73 (1.03)            |        | 3.74 (0.982)      |        | 0.992   |
| Median [Min, Max] | 4.00<br>5.00]     | [2.00, | 4.00<br>5.00]          | [1.00, | 4.00<br>5.00]     | [1.00, |         |
| Missing           | 0 (0%)            |        | 2 (3.1%)               |        | 2 (2.1%)          |        |         |

|                      | Control<br>(N=29) | Intervention<br>(N=65) | Overall<br>(N=94) | P-value |
|----------------------|-------------------|------------------------|-------------------|---------|
| <b>t1_PEAAtt_14r</b> |                   |                        |                   |         |
| Mean (SD)            | 3.62 (0.942)      | 4.02 (0.924)           | 3.89 (0.943)      | 0.174   |
| Median [Min, Max]    | 4.00 [2.00, 5.00] | 4.00 [2.00, 5.00]      | 4.00 [2.00, 5.00] |         |
| Missing              | 0 (0%)            | 2 (3.1%)               | 2 (2.1%)          |         |
| <b>t1_pea_sum</b>    |                   |                        |                   |         |
| Mean (SD)            | 43.4 (5.45)       | 45.9 (5.08)            | 45.1 (5.30)       | 0.112   |
| Median [Min, Max]    | 44.0 [30.0, 53.0] | 46.0 [31.0, 55.0]      | 45.0 [30.0, 55.0] |         |
| Missing              | 0 (0%)            | 3 (4.6%)               | 3 (3.2%)          |         |
| <b>t1_pea_ec</b>     |                   |                        |                   |         |
| Mean (SD)            | 19.8 (3.50)       | 21.0 (2.96)            | 20.6 (3.17)       | 0.218   |
| Median [Min, Max]    | 20.0 [9.00, 25.0] | 21.0 [14.0, 25.0]      | 21.0 [9.00, 25.0] |         |
| Missing              | 0 (0%)            | 2 (3.1%)               | 2 (2.1%)          |         |
| <b>t1_pea_fcc</b>    |                   |                        |                   |         |
| Mean (SD)            | 11.1 (2.07)       | 12.1 (2.22)            | 11.8 (2.21)       | 0.163   |
| Median [Min, Max]    | 11.0 [8.00, 15.0] | 12.0 [7.00, 15.0]      | 12.0 [7.00, 15.0] |         |
| Missing              | 0 (0%)            | 2 (3.1%)               | 2 (2.1%)          |         |
| <b>t1_pea_esi</b>    |                   |                        |                   |         |
| Mean (SD)            | 4.34 (0.670)      | 4.25 (0.685)           | 4.28 (0.678)      | 0.81    |
| Median [Min, Max]    | 4.00 [3.00, 5.00] | 4.00 [2.00, 5.00]      | 4.00 [2.00, 5.00] |         |
| <b>t1_pea_wtpp</b>   |                   |                        |                   |         |
| Mean (SD)            | 3.79 (0.620)      | 4.00 (0.873)           | 3.94 (0.805)      | 0.518   |
| Median [Min, Max]    | 4.00 [3.00, 5.00] | 4.00 [1.00, 5.00]      | 4.00 [1.00, 5.00] |         |
| Missing              | 0 (0%)            | 1 (1.5%)               | 1 (1.1%)          |         |
| <b>t1_pea_wtps</b>   |                   |                        |                   |         |
| Mean (SD)            | 4.38 (0.775)      | 4.60 (0.494)           | 4.53 (0.599)      | 0.256   |
| Median [Min, Max]    | 5.00 [2.00, 5.00] | 5.00 [4.00, 5.00]      | 5.00 [2.00, 5.00] |         |
| <b>t2_PEAAtt_1r</b>  |                   |                        |                   |         |
| Mean (SD)            | 4.17 (0.602)      | 4.32 (0.709)           | 4.28 (0.678)      | 0.611   |
| Median [Min, Max]    | 4.00 [3.00, 5.00] | 4.00 [1.00, 5.00]      | 4.00 [1.00, 5.00] |         |
| <b>t2_PEAAtt_2</b>   |                   |                        |                   |         |
| Mean (SD)            | 2.90 (1.08)       | 2.94 (1.04)            | 2.93 (1.05)       | 0.984   |

|                   | Control<br>(N=29) |                 | Intervention<br>(N=65) |                 | Overall<br>(N=94) |                 | P-value |
|-------------------|-------------------|-----------------|------------------------|-----------------|-------------------|-----------------|---------|
| Median [Min, Max] | 3.00<br>5.00]     | [1.00,<br>5.00] | 3.00<br>5.00]          | [1.00,<br>5.00] | 3.00<br>5.00]     | [1.00,<br>5.00] |         |
| t2_PEAtt_3r       |                   |                 |                        |                 |                   |                 |         |
| Mean (SD)         | 4.52 (0.688)      |                 | 4.60 (0.725)           |                 | 4.57 (0.711)      |                 | 0.873   |
| Median [Min, Max] | 5.00<br>5.00]     | [3.00,<br>5.00] | 5.00<br>5.00]          | [2.00,<br>5.00] | 5.00<br>5.00]     | [2.00,<br>5.00] |         |
| t2_PEAtt_4r       |                   |                 |                        |                 |                   |                 |         |
| Mean (SD)         | 3.34 (1.11)       |                 | 3.37 (1.10)            |                 | 3.36 (1.10)       |                 | 0.995   |
| Median [Min, Max] | 4.00<br>5.00]     | [1.00,<br>5.00] | 3.00<br>5.00]          | [1.00,<br>5.00] | 3.50<br>5.00]     | [1.00,<br>5.00] |         |
| t2_PEAtt_5r       |                   |                 |                        |                 |                   |                 |         |
| Mean (SD)         | 4.24 (0.912)      |                 | 4.57 (0.706)           |                 | 4.47 (0.786)      |                 | 0.173   |
| Median [Min, Max] | 4.00<br>5.00]     | [2.00,<br>5.00] | 5.00<br>5.00]          | [1.00,<br>5.00] | 5.00<br>5.00]     | [1.00,<br>5.00] |         |
| t2_PEAtt_6        |                   |                 |                        |                 |                   |                 |         |
| Mean (SD)         | 3.59 (0.780)      |                 | 3.80 (1.16)            |                 | 3.73 (1.06)       |                 | 0.666   |
| Median [Min, Max] | 4.00<br>5.00]     | [2.00,<br>5.00] | 4.00<br>5.00]          | [1.00,<br>5.00] | 4.00<br>5.00]     | [1.00,<br>5.00] |         |
| t2_PEAtt_7        |                   |                 |                        |                 |                   |                 |         |
| Mean (SD)         | 4.07 (0.842)      |                 | 4.14 (1.06)            |                 | 4.12 (0.993)      |                 | 0.952   |
| Median [Min, Max] | 4.00<br>5.00]     | [2.00,<br>5.00] | 4.00<br>5.00]          | [1.00,<br>5.00] | 4.00<br>5.00]     | [1.00,<br>5.00] |         |
| t2_PEAtt_8r       |                   |                 |                        |                 |                   |                 |         |
| Mean (SD)         | 4.14 (1.06)       |                 | 4.45 (0.884)           |                 | 4.35 (0.947)      |                 | 0.346   |
| Median [Min, Max] | 4.00<br>5.00]     | [1.00,<br>5.00] | 5.00<br>5.00]          | [1.00,<br>5.00] | 5.00<br>5.00]     | [1.00,<br>5.00] |         |
| t2_PEAtt_9        |                   |                 |                        |                 |                   |                 |         |
| Mean (SD)         | 3.03 (1.12)       |                 | 3.56 (1.05)            |                 | 3.40 (1.09)       |                 | 0.0965  |
| Median [Min, Max] | 3.00<br>5.00]     | [1.00,<br>5.00] | 4.00<br>5.00]          | [1.00,<br>5.00] | 3.00<br>5.00]     | [1.00,<br>5.00] |         |
| Missing           | 0 (0%)            |                 | 1 (1.5%)               |                 | 1 (1.1%)          |                 |         |
| t2_PEAtt_10       |                   |                 |                        |                 |                   |                 |         |
| Mean (SD)         | 3.90 (1.11)       |                 | 4.14 (0.982)           |                 | 4.06 (1.02)       |                 | 0.573   |
| Median [Min, Max] | 4.00<br>5.00]     | [1.00,<br>5.00] | 4.00<br>5.00]          | [1.00,<br>5.00] | 4.00<br>5.00]     | [1.00,<br>5.00] |         |
| t2_PEAtt_11r      |                   |                 |                        |                 |                   |                 |         |
| Mean (SD)         | 3.66 (0.897)      |                 | 4.08 (1.15)            |                 | 3.95 (1.09)       |                 | 0.223   |
| Median [Min, Max] | 4.00<br>5.00]     | [2.00,<br>5.00] | 4.00<br>5.00]          | [1.00,<br>5.00] | 4.00<br>5.00]     | [1.00,<br>5.00] |         |
| t2_PEAtt_12r      |                   |                 |                        |                 |                   |                 |         |

|                   | Control<br>(N=29) | Intervention<br>(N=65) | Overall<br>(N=94) | P-value |
|-------------------|-------------------|------------------------|-------------------|---------|
| Mean (SD)         | 3.76 (0.689)      | 4.08 (0.620)           | 3.98 (0.655)      | 0.0924  |
| Median [Min, Max] | 4.00 [2.00, 5.00] | 4.00 [2.00, 5.00]      | 4.00 [2.00, 5.00] |         |
| t2_PEAAtt_13r     |                   |                        |                   |         |
| Mean (SD)         | 3.28 (1.03)       | 3.82 (1.09)            | 3.65 (1.09)       | 0.0858  |
| Median [Min, Max] | 4.00 [1.00, 5.00] | 4.00 [1.00, 5.00]      | 4.00 [1.00, 5.00] |         |
| t2_PEAAtt_14r     |                   |                        |                   |         |
| Mean (SD)         | 3.34 (1.08)       | 3.91 (1.13)            | 3.73 (1.14)       | 0.0842  |
| Median [Min, Max] | 4.00 [1.00, 5.00] | 4.00 [1.00, 5.00]      | 4.00 [1.00, 5.00] |         |
| t2_pea_sum        |                   |                        |                   |         |
| Mean (SD)         | 41.8 (5.12)       | 45.0 (5.19)            | 44.0 (5.35)       | 0.0291  |
| Median [Min, Max] | 42.0 [30.0, 53.0] | 45.0 [30.0, 55.0]      | 44.0 [30.0, 55.0] |         |
| Missing           | 0 (0%)            | 1 (1.5%)               | 1 (1.1%)          |         |
| t2_pea_ec         |                   |                        |                   |         |
| Mean (SD)         | 18.7 (3.46)       | 20.3 (3.42)            | 19.8 (3.49)       | 0.141   |
| Median [Min, Max] | 19.0 [11.0, 25.0] | 21.0 [8.00, 25.0]      | 20.0 [8.00, 25.0] |         |
| t2_pea_fcc        |                   |                        |                   |         |
| Mean (SD)         | 11.0 (2.02)       | 11.9 (2.15)            | 11.6 (2.14)       | 0.175   |
| Median [Min, Max] | 10.0 [8.00, 15.0] | 12.0 [7.00, 15.0]      | 12.0 [7.00, 15.0] |         |
| Missing           | 0 (0%)            | 1 (1.5%)               | 1 (1.1%)          |         |
| t2_pea_esi        |                   |                        |                   |         |
| Mean (SD)         | 4.17 (0.602)      | 4.32 (0.709)           | 4.28 (0.678)      | 0.611   |
| Median [Min, Max] | 4.00 [3.00, 5.00] | 4.00 [1.00, 5.00]      | 4.00 [1.00, 5.00] |         |
| t2_pea_wtpp       |                   |                        |                   |         |
| Mean (SD)         | 3.76 (0.689)      | 4.08 (0.620)           | 3.98 (0.655)      | 0.0924  |
| Median [Min, Max] | 4.00 [2.00, 5.00] | 4.00 [2.00, 5.00]      | 4.00 [2.00, 5.00] |         |
| t2_pea_wtps       |                   |                        |                   |         |
| Mean (SD)         | 4.14 (1.06)       | 4.45 (0.884)           | 4.35 (0.947)      | 0.346   |
| Median [Min, Max] | 4.00 [1.00, 5.00] | 5.00 [1.00, 5.00]      | 5.00 [1.00, 5.00] |         |
| t1_PEA_1          |                   |                        |                   |         |
| Mean (SD)         | 3.52 (1.35)       | 3.72 (1.10)            | 3.66 (1.18)       | 0.737   |

|                   | Control<br>(N=29) |              | Intervention<br>(N=65) |              | Overall<br>(N=94) |              | P-value |
|-------------------|-------------------|--------------|------------------------|--------------|-------------------|--------------|---------|
| Median [Min, Max] | 4.00              | [1.00, 5.00] | 4.00                   | [1.00, 5.00] | 4.00              | [1.00, 5.00] |         |
| t1_PEA_2          |                   |              |                        |              |                   |              |         |
| Mean (SD)         | 3.38 (1.50)       |              | 3.73 (1.20)            |              | 3.62 (1.30)       |              | 0.476   |
| Median [Min, Max] | 4.00              | [1.00, 5.00] | 4.00                   | [1.00, 5.00] | 4.00              | [1.00, 5.00] |         |
| Missing           | 0 (0%)            |              | 1 (1.5%)               |              | 1 (1.1%)          |              |         |
| t1_PEA_3          |                   |              |                        |              |                   |              |         |
| Mean (SD)         | 3.62 (1.59)       |              | 3.73 (1.22)            |              | 3.70 (1.34)       |              | 0.931   |
| Median [Min, Max] | 4.00              | [1.00, 5.00] | 4.00                   | [1.00, 5.00] | 4.00              | [1.00, 5.00] |         |
| Missing           | 0 (0%)            |              | 1 (1.5%)               |              | 1 (1.1%)          |              |         |
| t1_PEA_4          |                   |              |                        |              |                   |              |         |
| Mean (SD)         | 3.66 (1.26)       |              | 4.12 (1.13)            |              | 3.98 (1.18)       |              | 0.207   |
| Median [Min, Max] | 4.00              | [1.00, 5.00] | 4.00                   | [1.00, 5.00] | 4.00              | [1.00, 5.00] |         |
| t1_PEA_5          |                   |              |                        |              |                   |              |         |
| Mean (SD)         | 3.03 (1.50)       |              | 3.54 (1.23)            |              | 3.38 (1.33)       |              | 0.236   |
| Median [Min, Max] | 3.00              | [1.00, 5.00] | 4.00                   | [1.00, 5.00] | 4.00              | [1.00, 5.00] |         |
| t1_PEA_6          |                   |              |                        |              |                   |              |         |
| Mean (SD)         | 2.00 (1.28)       |              | 2.52 (1.32)            |              | 2.36 (1.33)       |              | 0.209   |
| Median [Min, Max] | 1.00              | [1.00, 5.00] | 2.00                   | [1.00, 5.00] | 2.00              | [1.00, 5.00] |         |
| t1_PEA_7          |                   |              |                        |              |                   |              |         |
| Mean (SD)         | 3.66 (0.936)      |              | 3.98 (1.12)            |              | 3.88 (1.08)       |              | 0.391   |
| Median [Min, Max] | 4.00              | [1.00, 5.00] | 4.00                   | [1.00, 5.00] | 4.00              | [1.00, 5.00] |         |
| t1_PEA_8          |                   |              |                        |              |                   |              |         |
| Mean (SD)         | 3.48 (0.949)      |              | 3.78 (0.812)           |              | 3.68 (0.864)      |              | 0.313   |
| Median [Min, Max] | 4.00              | [2.00, 5.00] | 4.00                   | [2.00, 5.00] | 4.00              | [2.00, 5.00] |         |
| Missing           | 0 (0%)            |              | 2 (3.1%)               |              | 2 (2.1%)          |              |         |
| t1_PEA_9          |                   |              |                        |              |                   |              |         |
| Mean (SD)         | 3.45 (0.870)      |              | 3.85 (0.815)           |              | 3.72 (0.848)      |              | 0.108   |
| Median [Min, Max] | 3.00              | [2.00, 5.00] | 4.00                   | [2.00, 5.00] | 4.00              | [2.00, 5.00] |         |
| t1_PEA_10         |                   |              |                        |              |                   |              |         |
| Mean (SD)         | 2.17 (0.889)      |              | 2.63 (1.08)            |              | 2.48 (1.04)       |              | 0.149   |

|                   | Control<br>(N=29) |              | Intervention<br>(N=65) |              | Overall<br>(N=94) |              | P-value     |
|-------------------|-------------------|--------------|------------------------|--------------|-------------------|--------------|-------------|
| Median [Min, Max] | 2.00              | [1.00, 4.00] | 2.00                   | [1.00, 5.00] | 2.00              | [1.00, 5.00] |             |
| Missing           | 0 (0%)            |              | 1 (1.5%)               |              | 1 (1.1%)          |              |             |
| t1_PEA_11         |                   |              |                        |              |                   |              |             |
| Mean (SD)         | 2.00 (1.13)       |              | 2.52 (1.26)            |              | 2.36 (1.24)       |              | 0.168       |
| Median [Min, Max] | 2.00              | [1.00, 5.00] | 2.00                   | [1.00, 5.00] | 2.00              | [1.00, 5.00] |             |
| t1_PEA_12         |                   |              |                        |              |                   |              |             |
| Mean (SD)         | 1.62 (1.08)       |              | 2.17 (1.28)            |              | 2.00 (1.24)       |              | 0.141       |
| Median [Min, Max] | 1.00              | [1.00, 5.00] | 2.00                   | [1.00, 5.00] | 1.00              | [1.00, 5.00] |             |
| t1_PEA_13         |                   |              |                        |              |                   |              |             |
| Mean (SD)         | 2.86 (1.57)       |              | 3.95 (1.26)            |              | 3.62 (1.45)       |              | 0.0028<br>1 |
| Median [Min, Max] | 3.00              | [1.00, 5.00] | 4.00                   | [1.00, 5.00] | 4.00              | [1.00, 5.00] |             |
| t1_PEA_14         |                   |              |                        |              |                   |              |             |
| Mean (SD)         | 2.34 (1.40)       |              | 3.22 (1.34)            |              | 2.95 (1.41)       |              | 0.0205      |
| Median [Min, Max] | 2.00              | [1.00, 5.00] | 3.00                   | [1.00, 5.00] | 3.00              | [1.00, 5.00] |             |
| t1_PEA_15         |                   |              |                        |              |                   |              |             |
| Mean (SD)         | 1.38 (1.08)       |              | 2.14 (1.36)            |              | 1.90 (1.32)       |              | 0.0345      |
| Median [Min, Max] | 1.00              | [1.00, 5.00] | 2.00                   | [1.00, 5.00] | 1.00              | [1.00, 5.00] |             |
| Missing           | 0 (0%)            |              | 1 (1.5%)               |              | 1 (1.1%)          |              |             |
| t1_PEA_16         |                   |              |                        |              |                   |              |             |
| Mean (SD)         | 2.17 (1.34)       |              | 2.97 (1.31)            |              | 2.72 (1.36)       |              | 0.0311      |
| Median [Min, Max] | 2.00              | [1.00, 5.00] | 3.00                   | [1.00, 5.00] | 3.00              | [1.00, 5.00] |             |
| t1_PEA_17         |                   |              |                        |              |                   |              |             |
| Mean (SD)         | 1.38 (0.979)      |              | 2.35 (1.27)            |              | 2.05 (1.26)       |              | 0.0022      |
| Median [Min, Max] | 1.00              | [1.00, 5.00] | 2.00                   | [1.00, 5.00] | 1.50              | [1.00, 5.00] |             |
| t1_PEA_18         |                   |              |                        |              |                   |              |             |
| Mean (SD)         | 1.72 (0.455)      |              | 1.71 (0.458)           |              | 1.71 (0.455)      |              | 0.987       |
| Median [Min, Max] | 2.00              | [1.00, 2.00] | 2.00                   | [1.00, 2.00] | 2.00              | [1.00, 2.00] |             |
| t1_PEA_19         |                   |              |                        |              |                   |              |             |
| Mean (SD)         | 1.93 (0.258)      |              | 1.85 (0.364)           |              | 1.87 (0.336)      |              | 0.527       |



|                   | Control<br>(N=29) |                 | Intervention<br>(N=65) |                 | Overall<br>(N=94) |                 | P-value     |
|-------------------|-------------------|-----------------|------------------------|-----------------|-------------------|-----------------|-------------|
| Median [Min, Max] | 2.00<br>2.00]     | [1.00,<br>2.00] | 2.00<br>2.00]          | [1.00,<br>2.00] | 2.00<br>2.00]     | [1.00,<br>2.00] |             |
| t1_PEA_20         |                   |                 |                        |                 |                   |                 |             |
| Mean (SD)         | 1.79 (0.412)      |                 | 1.49 (0.504)           |                 | 1.59 (0.495)      |                 | 0.0235      |
| Median [Min, Max] | 2.00<br>2.00]     | [1.00,<br>2.00] | 1.00<br>2.00]          | [1.00,<br>2.00] | 2.00<br>2.00]     | [1.00,<br>2.00] |             |
| t1_PEA_21         |                   |                 |                        |                 |                   |                 |             |
| Mean (SD)         | 1.90 (0.310)      |                 | 1.85 (0.364)           |                 | 1.86 (0.347)      |                 | 0.81        |
| Median [Min, Max] | 2.00<br>2.00]     | [1.00,<br>2.00] | 2.00<br>2.00]          | [1.00,<br>2.00] | 2.00<br>2.00]     | [1.00,<br>2.00] |             |
| t1_PEA_22         |                   |                 |                        |                 |                   |                 |             |
| Mean (SD)         | 1.45 (0.506)      |                 | 1.47 (0.503)           |                 | 1.46 (0.501)      |                 | 0.984       |
| Median [Min, Max] | 1.00<br>2.00]     | [1.00,<br>2.00] | 1.00<br>2.00]          | [1.00,<br>2.00] | 1.00<br>2.00]     | [1.00,<br>2.00] |             |
| Missing           | 0 (0%)            |                 | 1 (1.5%)               |                 | 1 (1.1%)          |                 |             |
| t1_peb_sum        |                   |                 |                        |                 |                   |                 |             |
| Mean (SD)         | 45.7 (10.2)       |                 | 55.0 (11.2)            |                 | 52.0 (11.7)       |                 | 0.0016<br>2 |
| Median [Min, Max] | 45.0<br>72.0]     | [26.0,<br>72.0] | 54.5<br>81.0]          | [26.0,<br>81.0] | 52.0<br>81.0]     | [26.0,<br>81.0] |             |
| Missing           | 0 (0%)            |                 | 3 (4.6%)               |                 | 3 (3.2%)          |                 |             |
| t1_peb_transport  |                   |                 |                        |                 |                   |                 |             |
| Mean (SD)         | 14.2 (4.22)       |                 | 15.3 (3.47)            |                 | 14.9 (3.74)       |                 | 0.414       |
| Median [Min, Max] | 15.0<br>20.0]     | [5.00,<br>20.0] | 16.0<br>20.0]          | [4.00,<br>20.0] | 16.0<br>20.0]     | [4.00,<br>20.0] |             |
| Missing           | 0 (0%)            |                 | 2 (3.1%)               |                 | 2 (2.1%)          |                 |             |
| t1_peb_food       |                   |                 |                        |                 |                   |                 |             |
| Mean (SD)         | 8.69 (2.99)       |                 | 10.0 (3.06)            |                 | 9.63 (3.09)       |                 | 0.143       |
| Median [Min, Max] | 8.00<br>14.0]     | [3.00,<br>14.0] | 10.0<br>15.0]          | [3.00,<br>15.0] | 10.0<br>15.0]     | [3.00,<br>15.0] |             |
| t1_peb_waste      |                   |                 |                        |                 |                   |                 |             |
| Mean (SD)         | 6.93 (1.58)       |                 | 7.62 (1.31)            |                 | 7.40 (1.43)       |                 | 0.0988      |
| Median [Min, Max] | 7.00<br>10.0]     | [4.00,<br>10.0] | 8.00<br>10.0]          | [5.00,<br>10.0] | 7.00<br>10.0]     | [4.00,<br>10.0] |             |
| Missing           | 0 (0%)            |                 | 2 (3.1%)               |                 | 2 (2.1%)          |                 |             |
| t1_peb_adapt      |                   |                 |                        |                 |                   |                 |             |
| Mean (SD)         | 2.17 (0.889)      |                 | 2.63 (1.08)            |                 | 2.48 (1.04)       |                 | 0.149       |
| Median [Min, Max] | 2.00<br>4.00]     | [1.00,<br>4.00] | 2.00<br>5.00]          | [1.00,<br>5.00] | 2.00<br>5.00]     | [1.00,<br>5.00] |             |
| Missing           | 0 (0%)            |                 | 1 (1.5%)               |                 | 1 (1.1%)          |                 |             |

|                      | Control<br>(N=29) | Intervention<br>(N=65) | Overall<br>(N=94) | P-value             |
|----------------------|-------------------|------------------------|-------------------|---------------------|
| <b>t1_peb_agency</b> |                   |                        |                   |                     |
| Mean (SD)            | 13.8 (6.53)       | 19.5 (6.44)            | 17.7 (6.96)       | 0.0010 <sub>1</sub> |
| Median [Min, Max]    | 12.0 [7.00, 32.0] | 19.5 [7.00, 34.0]      | 17.0 [7.00, 34.0] |                     |
| Missing              | 0 (0%)            | 1 (1.5%)               | 1 (1.1%)          |                     |
| <b>t2_PEA_1</b>      |                   |                        |                   |                     |
| Mean (SD)            | 3.97 (0.944)      | 3.72 (1.02)            | 3.80 (1.00)       | 0.556               |
| Median [Min, Max]    | 4.00 [1.00, 5.00] | 4.00 [1.00, 5.00]      | 4.00 [1.00, 5.00] |                     |
| <b>t2_PEA_2</b>      |                   |                        |                   |                     |
| Mean (SD)            | 3.83 (1.34)       | 4.09 (1.27)            | 4.01 (1.29)       | 0.657               |
| Median [Min, Max]    | 4.00 [1.00, 5.00] | 5.00 [1.00, 5.00]      | 4.00 [1.00, 5.00] |                     |
| <b>t2_PEA_3</b>      |                   |                        |                   |                     |
| Mean (SD)            | 3.41 (1.40)       | 3.80 (1.25)            | 3.68 (1.31)       | 0.416               |
| Median [Min, Max]    | 4.00 [1.00, 5.00] | 4.00 [1.00, 5.00]      | 4.00 [1.00, 5.00] |                     |
| <b>t2_PEA_4</b>      |                   |                        |                   |                     |
| Mean (SD)            | 3.97 (1.24)       | 4.17 (1.07)            | 4.11 (1.12)       | 0.719               |
| Median [Min, Max]    | 4.00 [1.00, 5.00] | 5.00 [1.00, 5.00]      | 4.00 [1.00, 5.00] |                     |
| <b>t2_PEA_5</b>      |                   |                        |                   |                     |
| Mean (SD)            | 3.03 (1.40)       | 3.56 (1.23)            | 3.40 (1.30)       | 0.193               |
| Median [Min, Max]    | 3.00 [1.00, 5.00] | 4.00 [1.00, 5.00]      | 4.00 [1.00, 5.00] |                     |
| Missing              | 0 (0%)            | 1 (1.5%)               | 1 (1.1%)          |                     |
| <b>t2_PEA_6</b>      |                   |                        |                   |                     |
| Mean (SD)            | 2.10 (1.29)       | 2.72 (1.34)            | 2.53 (1.35)       | 0.124               |
| Median [Min, Max]    | 2.00 [1.00, 5.00] | 3.00 [1.00, 5.00]      | 2.00 [1.00, 5.00] |                     |
| Missing              | 0 (0%)            | 1 (1.5%)               | 1 (1.1%)          |                     |
| <b>t2_PEA_7</b>      |                   |                        |                   |                     |
| Mean (SD)            | 3.62 (0.775)      | 3.98 (1.07)            | 3.87 (0.997)      | 0.262               |
| Median [Min, Max]    | 4.00 [2.00, 5.00] | 4.00 [1.00, 5.00]      | 4.00 [1.00, 5.00] |                     |
| <b>t2_PEA_8</b>      |                   |                        |                   |                     |
| Mean (SD)            | 3.66 (0.857)      | 3.95 (0.785)           | 3.86 (0.815)      | 0.263               |
| Median [Min, Max]    | 4.00 [1.00, 5.00] | 4.00 [2.00, 5.00]      | 4.00 [1.00, 5.00] |                     |

|                   | Control<br>(N=29) | Intervention<br>(N=65) | Overall<br>(N=94) | P-value     |
|-------------------|-------------------|------------------------|-------------------|-------------|
| Missing           | 0 (0%)            | 1 (1.5%)               | 1 (1.1%)          |             |
| t2_PEA_9          |                   |                        |                   |             |
| Mean (SD)         | 3.62 (0.903)      | 3.82 (0.827)           | 3.76 (0.851)      | 0.593       |
| Median [Min, Max] | 4.00 [2.00, 5.00] | 4.00 [2.00, 5.00]      | 4.00 [2.00, 5.00] |             |
| t2_PEA_10         |                   |                        |                   |             |
| Mean (SD)         | 2.14 (0.953)      | 2.88 (0.976)           | 2.65 (1.02)       | 0.0047<br>4 |
| Median [Min, Max] | 2.00 [1.00, 5.00] | 3.00 [1.00, 5.00]      | 3.00 [1.00, 5.00] |             |
| t2_PEA_11         |                   |                        |                   |             |
| Mean (SD)         | 1.72 (0.960)      | 2.54 (1.30)            | 2.29 (1.26)       | 0.0139      |
| Median [Min, Max] | 1.00 [1.00, 4.00] | 2.00 [1.00, 5.00]      | 2.00 [1.00, 5.00] |             |
| t2_PEA_12         |                   |                        |                   |             |
| Mean (SD)         | 1.48 (0.829)      | 2.26 (1.19)            | 2.02 (1.15)       | 0.0088<br>2 |
| Median [Min, Max] | 1.00 [1.00, 4.00] | 2.00 [1.00, 5.00]      | 2.00 [1.00, 5.00] |             |
| t2_PEA_13         |                   |                        |                   |             |
| Mean (SD)         | 2.59 (1.43)       | 3.74 (1.42)            | 3.38 (1.51)       | 0.0025      |
| Median [Min, Max] | 3.00 [1.00, 5.00] | 4.00 [1.00, 5.00]      | 4.00 [1.00, 5.00] |             |
| t2_PEA_14         |                   |                        |                   |             |
| Mean (SD)         | 2.41 (1.32)       | 3.25 (1.33)            | 2.99 (1.38)       | 0.0246      |
| Median [Min, Max] | 2.00 [1.00, 5.00] | 3.00 [1.00, 5.00]      | 3.00 [1.00, 5.00] |             |
| t2_PEA_15         |                   |                        |                   |             |
| Mean (SD)         | 1.41 (0.946)      | 2.29 (1.45)            | 2.02 (1.38)       | 0.0156      |
| Median [Min, Max] | 1.00 [1.00, 5.00] | 2.00 [1.00, 5.00]      | 1.00 [1.00, 5.00] |             |
| t2_PEA_16         |                   |                        |                   |             |
| Mean (SD)         | 2.31 (1.34)       | 3.20 (1.28)            | 2.93 (1.35)       | 0.0122      |
| Median [Min, Max] | 2.00 [1.00, 5.00] | 3.00 [1.00, 5.00]      | 3.00 [1.00, 5.00] |             |
| t2_PEA_17         |                   |                        |                   |             |
| Mean (SD)         | 1.48 (1.02)       | 2.92 (1.27)            | 2.48 (1.37)       | <0.001      |
| Median [Min, Max] | 1.00 [1.00, 5.00] | 3.00 [1.00, 5.00]      | 2.00 [1.00, 5.00] |             |
| t2_PEA_18         |                   |                        |                   |             |

|                   | Control<br>(N=29) | Intervention<br>(N=65) | Overall<br>(N=94) | P-value |
|-------------------|-------------------|------------------------|-------------------|---------|
| Mean (SD)         | 1.72 (0.455)      | 1.74 (0.443)           | 1.73 (0.444)      | 0.99    |
| Median [Min, Max] | 2.00 [1.00, 2.00] | 2.00 [1.00, 2.00]      | 2.00 [1.00, 2.00] |         |
| t2_PEA_19         |                   |                        |                   |         |
| Mean (SD)         | 1.93 (0.258)      | 1.86 (0.348)           | 1.88 (0.323)      | 0.63    |
| Median [Min, Max] | 2.00 [1.00, 2.00] | 2.00 [1.00, 2.00]      | 2.00 [1.00, 2.00] |         |
| t2_PEA_20         |                   |                        |                   |         |
| Mean (SD)         | 1.79 (0.412)      | 1.63 (0.486)           | 1.68 (0.469)      | 0.3     |
| Median [Min, Max] | 2.00 [1.00, 2.00] | 2.00 [1.00, 2.00]      | 2.00 [1.00, 2.00] |         |
| t2_PEA_21         |                   |                        |                   |         |
| Mean (SD)         | 1.90 (0.310)      | 1.85 (0.364)           | 1.86 (0.347)      | 0.81    |
| Median [Min, Max] | 2.00 [1.00, 2.00] | 2.00 [1.00, 2.00]      | 2.00 [1.00, 2.00] |         |
| t2_PEA_22         |                   |                        |                   |         |
| Mean (SD)         | 1.52 (0.509)      | 1.51 (0.504)           | 1.51 (0.503)      | 0.996   |
| Median [Min, Max] | 2.00 [1.00, 2.00] | 2.00 [1.00, 2.00]      | 2.00 [1.00, 2.00] |         |
| t2_peb_sum        |                   |                        |                   |         |
| Mean (SD)         | 46.8 (9.56)       | 56.7 (10.8)            | 53.5 (11.4)       | <0.001  |
| Median [Min, Max] | 45.0 [25.0, 69.0] | 56.0 [30.0, 84.0]      | 54.0 [25.0, 84.0] |         |
| Missing           | 0 (0%)            | 3 (4.6%)               | 3 (3.2%)          |         |
| t2_peb_transport  |                   |                        |                   |         |
| Mean (SD)         | 15.2 (3.67)       | 15.8 (3.33)            | 15.6 (3.43)       | 0.727   |
| Median [Min, Max] | 16.0 [6.00, 20.0] | 16.0 [5.00, 20.0]      | 16.0 [5.00, 20.0] |         |
| t2_peb_food       |                   |                        |                   |         |
| Mean (SD)         | 8.76 (2.64)       | 10.3 (3.14)            | 9.78 (3.06)       | 0.0911  |
| Median [Min, Max] | 9.00 [5.00, 14.0] | 11.0 [3.00, 15.0]      | 10.0 [3.00, 15.0] |         |
| Missing           | 0 (0%)            | 2 (3.1%)               | 2 (2.1%)          |         |
| t2_peb_waste      |                   |                        |                   |         |
| Mean (SD)         | 7.28 (1.49)       | 7.75 (1.21)            | 7.60 (1.31)       | 0.271   |
| Median [Min, Max] | 7.00 [3.00, 10.0] | 8.00 [6.00, 10.0]      | 8.00 [3.00, 10.0] |         |
| Missing           | 0 (0%)            | 1 (1.5%)               | 1 (1.1%)          |         |
| t2_peb_adapt      |                   |                        |                   |         |

|                   | Control<br>(N=29)    | Intervention<br>(N=65) | Overall<br>(N=94)    | P-value     |
|-------------------|----------------------|------------------------|----------------------|-------------|
| Mean (SD)         | 2.14 (0.953)         | 2.88 (0.976)           | 2.65 (1.02)          | 0.0047<br>4 |
| Median [Min, Max] | 2.00 [1.00,<br>5.00] | 3.00 [1.00,<br>5.00]   | 3.00 [1.00,<br>5.00] |             |
| t2_peb_agency     |                      |                        |                      |             |
| Mean (SD)         | 13.4 (6.02)          | 20.2 (6.32)            | 18.1 (6.95)          | <0.001      |
| Median [Min, Max] | 12.0 [7.00,<br>32.0] | 20.0 [8.00,<br>35.0]   | 18.0 [7.00,<br>35.0] |             |
| t1_Q11_leader     |                      |                        |                      |             |
| Mean (SD)         | NA (NA)              | 3.48 (0.903)           | 3.48 (0.903)         | 1           |
| Median [Min, Max] | NA [NA, NA]          | 3.00 [1.00,<br>5.00]   | 3.00 [1.00,<br>5.00] |             |
| Missing           | 29 (100%)            | 0 (0%)                 | 29 (30.9%)           |             |
| t1_Q11_manager    |                      |                        |                      |             |
| Mean (SD)         | NA (NA)              | 3.28 (1.12)            | 3.28 (1.12)          | 1           |
| Median [Min, Max] | NA [NA, NA]          | 3.00 [1.00,<br>5.00]   | 3.00 [1.00,<br>5.00] |             |
| Missing           | 29 (100%)            | 1 (1.5%)               | 30 (31.9%)           |             |
| t1_Q11_peers      |                      |                        |                      |             |
| Mean (SD)         | NA (NA)              | 3.28 (0.826)           | 3.28 (0.826)         | 1           |
| Median [Min, Max] | NA [NA, NA]          | 3.00 [1.00,<br>5.00]   | 3.00 [1.00,<br>5.00] |             |
| Missing           | 29 (100%)            | 1 (1.5%)               | 30 (31.9%)           |             |
| t1_Q11_staff      |                      |                        |                      |             |
| Mean (SD)         | NA (NA)              | 3.43 (1.01)            | 3.43 (1.01)          | 1           |
| Median [Min, Max] | NA [NA, NA]          | 3.00 [1.00,<br>5.00]   | 3.00 [1.00,<br>5.00] |             |
| Missing           | 29 (100%)            | 5 (7.7%)               | 34 (36.2%)           |             |
| t1_Q11_you        |                      |                        |                      |             |
| Mean (SD)         | 3.17 (0.928)         | 4.00 (0.810)           | 3.74 (0.927)         | <0.001      |
| Median [Min, Max] | 3.00 [1.00,<br>5.00] | 4.00 [2.00,<br>5.00]   | 4.00 [1.00,<br>5.00] |             |
| t1_org_standup    |                      |                        |                      |             |
| Mean (SD)         | NA (NA)              | 17.6 (3.48)            | 17.6 (3.48)          | 1           |
| Median [Min, Max] | NA [NA, NA]          | 17.0 [9.00,<br>25.0]   | 17.0 [9.00,<br>25.0] |             |
| Missing           | 29 (100%)            | 5 (7.7%)               | 34 (36.2%)           |             |
| t1_Q12_projects   |                      |                        |                      |             |
| Mean (SD)         | 2.66 (1.52)          | 3.42 (1.10)            | 3.18 (1.29)          | 0.0287      |

|                    | Control<br>(N=29) | Intervention<br>(N=65) | Overall<br>(N=94) | P-value |
|--------------------|-------------------|------------------------|-------------------|---------|
| Median [Min, Max]  | 3.00 [1.00, 6.00] | 3.00 [1.00, 5.00]      | 3.00 [1.00, 6.00] |         |
| t1_Q12_department  |                   |                        |                   |         |
| Mean (SD)          | 2.66 (1.37)       | 3.14 (0.990)           | 2.99 (1.14)       | 0.161   |
| Median [Min, Max]  | 3.00 [1.00, 6.00] | 3.00 [1.00, 5.00]      | 3.00 [1.00, 6.00] |         |
| Missing            | 0 (0%)            | 1 (1.5%)               | 1 (1.1%)          |         |
| t1_Q12_visions     |                   |                        |                   |         |
| Mean (SD)          | 2.79 (1.35)       | 3.31 (1.07)            | 3.15 (1.18)       | 0.143   |
| Median [Min, Max]  | 3.00 [1.00, 6.00] | 3.00 [1.00, 5.00]      | 3.00 [1.00, 6.00] |         |
| Missing            | 0 (0%)            | 1 (1.5%)               | 1 (1.1%)          |         |
| t1_Q12_regulations |                   |                        |                   |         |
| Mean (SD)          | 2.66 (1.08)       | 3.00 (1.04)            | 2.89 (1.06)       | 0.346   |
| Median [Min, Max]  | 3.00 [1.00, 5.00] | 3.00 [1.00, 5.00]      | 3.00 [1.00, 5.00] |         |
| Missing            | 0 (0%)            | 1 (1.5%)               | 1 (1.1%)          |         |
| t1_Q12_planning    |                   |                        |                   |         |
| Mean (SD)          | 2.24 (1.33)       | 2.72 (0.983)           | 2.57 (1.12)       | 0.16    |
| Median [Min, Max]  | 2.00 [1.00, 6.00] | 3.00 [1.00, 5.00]      | 3.00 [1.00, 6.00] |         |
| Missing            | 0 (0%)            | 1 (1.5%)               | 1 (1.1%)          |         |
| t1_Q12_training    |                   |                        |                   |         |
| Mean (SD)          | 2.31 (1.04)       | 2.88 (1.02)            | 2.70 (1.05)       | 0.0544  |
| Median [Min, Max]  | 2.00 [1.00, 4.00] | 3.00 [1.00, 5.00]      | 3.00 [1.00, 5.00] |         |
| Missing            | 0 (0%)            | 1 (1.5%)               | 1 (1.1%)          |         |
| t1_Q12_structure   |                   |                        |                   |         |
| Mean (SD)          | 2.62 (1.45)       | 2.84 (0.946)           | 2.77 (1.12)       | 0.676   |
| Median [Min, Max]  | 3.00 [1.00, 6.00] | 3.00 [1.00, 5.00]      | 3.00 [1.00, 6.00] |         |
| Missing            | 0 (0%)            | 1 (1.5%)               | 1 (1.1%)          |         |
| t1_Q12_cooperation |                   |                        |                   |         |
| Mean (SD)          | 3.10 (1.82)       | 2.98 (1.05)            | 3.02 (1.33)       | 0.924   |
| Median [Min, Max]  | 3.00 [1.00, 6.00] | 3.00 [1.00, 5.00]      | 3.00 [1.00, 6.00] |         |
| Missing            | 0 (0%)            | 2 (3.1%)               | 2 (2.1%)          |         |
| t1_Q12_budget      |                   |                        |                   |         |
| Mean (SD)          | 3.41 (1.96)       | 2.77 (0.913)           | 2.98 (1.36)       | 0.11    |

|                         | Control<br>(N=29) |              | Intervention<br>(N=65) |              | Overall<br>(N=94) |              | P-value |
|-------------------------|-------------------|--------------|------------------------|--------------|-------------------|--------------|---------|
| Median [Min, Max]       | 3.00              | [1.00, 6.00] | 3.00                   | [1.00, 5.00] | 3.00              | [1.00, 6.00] |         |
| Missing                 | 0 (0%)            |              | 3 (4.6%)               |              | 3 (3.2%)          |              |         |
| t1_Q12_hr               |                   |              |                        |              |                   |              |         |
| Mean (SD)               | 3.34 (2.04)       |              | 2.63 (0.938)           |              | 2.86 (1.41)       |              | 0.0793  |
| Median [Min, Max]       | 3.00              | [1.00, 6.00] | 3.00                   | [1.00, 5.00] | 3.00              | [1.00, 6.00] |         |
| Missing                 | 0 (0%)            |              | 2 (3.1%)               |              | 2 (2.1%)          |              |         |
| t1_org_integrated       |                   |              |                        |              |                   |              |         |
| Mean (SD)               | 27.8 (10.9)       |              | 29.5 (8.04)            |              | 29.0 (9.04)       |              | 0.698   |
| Median [Min, Max]       | 28.0              | [10.0, 51.0] | 28.0                   | [13.0, 50.0] | 28.0              | [10.0, 51.0] |         |
| Missing                 | 0 (0%)            |              | 4 (6.2%)               |              | 4 (4.3%)          |              |         |
| t1_org_integrate_future |                   |              |                        |              |                   |              |         |
| Mean (SD)               | 2.66 (1.54)       |              | 4.08 (1.07)            |              | 3.64 (1.39)       |              | <0.001  |
| Median [Min, Max]       | 3.00              | [1.00, 6.00] | 4.00                   | [1.00, 5.00] | 4.00              | [1.00, 6.00] |         |
| t2_Q11_you              |                   |              |                        |              |                   |              |         |
| Mean (SD)               | 3.21 (1.08)       |              | 3.85 (0.870)           |              | 3.65 (0.981)      |              | 0.0131  |
| Median [Min, Max]       | 3.00              | [1.00, 5.00] | 4.00                   | [2.00, 5.00] | 4.00              | [1.00, 5.00] |         |
| t2_Q12_projects         |                   |              |                        |              |                   |              |         |
| Mean (SD)               | 2.41 (1.18)       |              | 3.42 (1.01)            |              | 3.11 (1.16)       |              | <0.001  |
| Median [Min, Max]       | 2.00              | [1.00, 5.00] | 3.00                   | [1.00, 5.00] | 3.00              | [1.00, 5.00] |         |
| t2_Q12_department       |                   |              |                        |              |                   |              |         |
| Mean (SD)               | 2.72 (1.19)       |              | 3.42 (1.03)            |              | 3.20 (1.12)       |              | 0.021   |
| Median [Min, Max]       | 3.00              | [1.00, 5.00] | 4.00                   | [2.00, 5.00] | 3.00              | [1.00, 5.00] |         |
| t2_Q12_visions          |                   |              |                        |              |                   |              |         |
| Mean (SD)               | 2.69 (1.11)       |              | 3.42 (1.17)            |              | 3.19 (1.19)       |              | 0.0217  |
| Median [Min, Max]       | 3.00              | [1.00, 5.00] | 3.50                   | [1.00, 5.00] | 3.00              | [1.00, 5.00] |         |
| Missing                 | 0 (0%)            |              | 1 (1.5%)               |              | 1 (1.1%)          |              |         |
| t2_Q12_regulations      |                   |              |                        |              |                   |              |         |
| Mean (SD)               | 2.62 (1.01)       |              | 3.11 (0.986)           |              | 2.96 (1.02)       |              | 0.0978  |
| Median [Min, Max]       | 3.00              | [1.00, 5.00] | 3.00                   | [1.00, 5.00] | 3.00              | [1.00, 5.00] |         |
| t2_Q12_planning         |                   |              |                        |              |                   |              |         |

|                             | Control<br>(N=29) | Intervention<br>(N=65) | Overall<br>(N=94) | P-value     |
|-----------------------------|-------------------|------------------------|-------------------|-------------|
| Mean (SD)                   | 2.24 (1.09)       | 2.85 (1.20)            | 2.66 (1.20)       | 0.0755      |
| Median [Min, Max]           | 2.00 [1.00, 4.00] | 3.00 [1.00, 5.00]      | 3.00 [1.00, 5.00] |             |
| t2_Q12_training             |                   |                        |                   |             |
| Mean (SD)                   | 2.45 (1.09)       | 3.22 (1.08)            | 2.98 (1.14)       | 0.0094<br>2 |
| Median [Min, Max]           | 2.00 [1.00, 4.00] | 3.00 [1.00, 5.00]      | 3.00 [1.00, 5.00] |             |
| t2_Q12_structure            |                   |                        |                   |             |
| Mean (SD)                   | 2.28 (1.10)       | 3.09 (1.04)            | 2.84 (1.12)       | 0.0042<br>5 |
| Median [Min, Max]           | 2.00 [1.00, 4.00] | 3.00 [1.00, 5.00]      | 3.00 [1.00, 5.00] |             |
| t2_Q12_cooperation          |                   |                        |                   |             |
| Mean (SD)                   | 2.21 (1.08)       | 3.06 (1.24)            | 2.80 (1.25)       | 0.0083<br>2 |
| Median [Min, Max]           | 2.00 [1.00, 4.00] | 3.00 [1.00, 5.00]      | 3.00 [1.00, 5.00] |             |
| t2_Q12_budget               |                   |                        |                   |             |
| Mean (SD)                   | 2.10 (1.05)       | 2.89 (1.13)            | 2.65 (1.16)       | 0.0089<br>1 |
| Median [Min, Max]           | 2.00 [1.00, 5.00] | 3.00 [1.00, 5.00]      | 2.50 [1.00, 5.00] |             |
| t2_Q12_hr                   |                   |                        |                   |             |
| Mean (SD)                   | 2.10 (1.01)       | 2.91 (1.05)            | 2.66 (1.10)       | 0.0042<br>5 |
| Median [Min, Max]           | 2.00 [1.00, 4.00] | 3.00 [1.00, 5.00]      | 2.00 [1.00, 5.00] |             |
| Missing                     | 0 (0%)            | 1 (1.5%)               | 1 (1.1%)          |             |
| t2_org_integrated           |                   |                        |                   |             |
| Mean (SD)                   | 23.8 (9.35)       | 31.5 (9.27)            | 29.1 (9.91)       | 0.0023<br>4 |
| Median [Min, Max]           | 22.0 [10.0, 42.0] | 32.0 [15.0, 50.0]      | 29.0 [10.0, 50.0] |             |
| Missing                     | 0 (0%)            | 2 (3.1%)               | 2 (2.1%)          |             |
| t2_org_integrate_futur<br>e |                   |                        |                   |             |
| Mean (SD)                   | 3.00 (1.39)       | 4.23 (1.06)            | 3.85 (1.29)       | <0.001      |
| Median [Min, Max]           | 3.00 [1.00, 5.00] | 5.00 [1.00, 5.00]      | 4.00 [1.00, 5.00] |             |
| t1_Q12_projects_inf         |                   |                        |                   |             |



|                        | Control<br>(N=29) | Intervention<br>(N=65) | Overall<br>(N=94) | P-value |
|------------------------|-------------------|------------------------|-------------------|---------|
| Mean (SD)              | 3.17 (0.889)      | 3.89 (0.935)           | 3.66 (0.975)      | 0.00412 |
| Median [Min, Max]      | 3.00 [1.00, 5.00] | 4.00 [2.00, 5.00]      | 4.00 [1.00, 5.00] |         |
| Missing                | 0 (0%)            | 2 (3.1%)               | 2 (2.1%)          |         |
| t1_Q12_department_inf  |                   |                        |                   |         |
| Mean (SD)              | 2.69 (1.04)       | 3.48 (0.998)           | 3.23 (1.07)       | 0.00409 |
| Median [Min, Max]      | 3.00 [1.00, 5.00] | 4.00 [1.00, 5.00]      | 3.00 [1.00, 5.00] |         |
| Missing                | 0 (0%)            | 2 (3.1%)               | 2 (2.1%)          |         |
| t1_Q12_visions_inf     |                   |                        |                   |         |
| Mean (SD)              | 2.28 (0.882)      | 3.63 (0.979)           | 3.20 (1.14)       | <0.001  |
| Median [Min, Max]      | 2.00 [1.00, 4.00] | 4.00 [1.00, 5.00]      | 3.00 [1.00, 5.00] |         |
| Missing                | 0 (0%)            | 3 (4.6%)               | 3 (3.2%)          |         |
| t1_Q12_regulations_inf |                   |                        |                   |         |
| Mean (SD)              | 2.21 (0.940)      | 3.29 (1.09)            | 2.95 (1.16)       | <0.001  |
| Median [Min, Max]      | 2.00 [1.00, 4.00] | 3.00 [1.00, 5.00]      | 3.00 [1.00, 5.00] |         |
| Missing                | 0 (0%)            | 3 (4.6%)               | 3 (3.2%)          |         |
| t1_Q12_planning_inf    |                   |                        |                   |         |
| Mean (SD)              | 2.62 (1.15)       | 3.24 (1.21)            | 3.04 (1.22)       | 0.0752  |
| Median [Min, Max]      | 3.00 [1.00, 5.00] | 3.00 [1.00, 5.00]      | 3.00 [1.00, 5.00] |         |
| Missing                | 0 (0%)            | 3 (4.6%)               | 3 (3.2%)          |         |
| t1_Q12_training_inf    |                   |                        |                   |         |
| Mean (SD)              | 2.52 (1.12)       | 3.31 (1.20)            | 3.05 (1.22)       | 0.0152  |
| Median [Min, Max]      | 3.00 [1.00, 4.00] | 3.00 [1.00, 5.00]      | 3.00 [1.00, 5.00] |         |
| Missing                | 0 (0%)            | 3 (4.6%)               | 3 (3.2%)          |         |
| t1_Q12_structure_inf   |                   |                        |                   |         |
| Mean (SD)              | 2.38 (1.01)       | 3.03 (1.17)            | 2.82 (1.16)       | 0.0422  |
| Median [Min, Max]      | 2.00 [1.00, 4.00] | 3.00 [1.00, 5.00]      | 3.00 [1.00, 5.00] |         |
| Missing                | 0 (0%)            | 3 (4.6%)               | 3 (3.2%)          |         |
| t1_Q12_cooperation_inf |                   |                        |                   |         |

|                   | Control<br>(N=29) | Intervention<br>(N=65) | Overall<br>(N=94) | P-value |
|-------------------|-------------------|------------------------|-------------------|---------|
| Mean (SD)         | 1.76 (0.739)      | 3.11 (1.25)            | 2.68 (1.28)       | <0.001  |
| Median [Min, Max] | 2.00 [1.00, 3.00] | 3.00 [1.00, 5.00]      | 3.00 [1.00, 5.00] |         |
| Missing           | 0 (0%)            | 4 (6.2%)               | 4 (4.3%)          |         |
| t1_Q12_budget_inf |                   |                        |                   |         |
| Mean (SD)         | 1.41 (0.568)      | 2.48 (1.14)            | 2.14 (1.11)       | <0.001  |
| Median [Min, Max] | 1.00 [1.00, 3.00] | 2.50 [1.00, 5.00]      | 2.00 [1.00, 5.00] |         |
| Missing           | 0 (0%)            | 3 (4.6%)               | 3 (3.2%)          |         |
| t1_Q12_hr_inf     |                   |                        |                   |         |
| Mean (SD)         | 1.41 (0.628)      | 2.47 (1.17)            | 2.14 (1.14)       | <0.001  |
| Median [Min, Max] | 1.00 [1.00, 3.00] | 2.50 [1.00, 5.00]      | 2.00 [1.00, 5.00] |         |
| Missing           | 0 (0%)            | 1 (1.5%)               | 1 (1.1%)          |         |
| t1_influence_sum  |                   |                        |                   |         |
| Mean (SD)         | 22.4 (6.14)       | 31.9 (9.07)            | 28.8 (9.33)       | <0.001  |
| Median [Min, Max] | 22.0 [10.0, 35.0] | 32.0 [11.0, 50.0]      | 28.0 [10.0, 50.0] |         |
| Missing           | 0 (0%)            | 5 (7.7%)               | 5 (5.3%)          |         |
| experience_max    |                   |                        |                   |         |
| Mean (SD)         | 0.667 (0.784)     | 1.24 (1.37)            | 1.04 (1.22)       | 0.146   |
| Median [Min, Max] | 1.00 [0, 3.00]    | 1.00 [0, 4.00]         | 1.00 [0, 4.00]    |         |
| Missing           | 2 (6.9%)          | 14 (21.5%)             | 16 (17.0%)        |         |
| t1_NJ_1r          |                   |                        |                   |         |
| Mean (SD)         | NA (NA)           | 4.00 (1.00)            | 4.00 (1.00)       | 1       |
| Median [Min, Max] | NA [NA, NA]       | 4.00 [1.00, 5.00]      | 4.00 [1.00, 5.00] |         |
| Missing           | 29 (100%)         | 0 (0%)                 | 29 (30.9%)        |         |
| t1_NJ_2r          |                   |                        |                   |         |
| Mean (SD)         | NA (NA)           | 3.80 (1.09)            | 3.80 (1.09)       | 1       |
| Median [Min, Max] | NA [NA, NA]       | 4.00 [1.00, 5.00]      | 4.00 [1.00, 5.00] |         |
| Missing           | 29 (100%)         | 0 (0%)                 | 29 (30.9%)        |         |
| t1_NJ_3r          |                   |                        |                   |         |
| Mean (SD)         | NA (NA)           | 3.82 (1.06)            | 3.82 (1.06)       | 1       |
| Median [Min, Max] | NA [NA, NA]       | 4.00 [2.00, 5.00]      | 4.00 [2.00, 5.00] |         |
| Missing           | 29 (100%)         | 0 (0%)                 | 29 (30.9%)        |         |
| t1_NR_1           |                   |                        |                   |         |

|                   | Control<br>(N=29) | Intervention<br>(N=65) | Overall<br>(N=94)    | P-value |
|-------------------|-------------------|------------------------|----------------------|---------|
| Mean (SD)         | NA (NA)           | 3.45 (0.919)           | 3.45 (0.919)         | 1       |
| Median [Min, Max] | NA [NA, NA]       | 4.00 [1.00,<br>5.00]   | 4.00 [1.00,<br>5.00] |         |
| Missing           | 29 (100%)         | 0 (0%)                 | 29 (30.9%)           |         |
| t1_NR_2           |                   |                        |                      |         |
| Mean (SD)         | NA (NA)           | 3.05 (1.01)            | 3.05 (1.01)          | 1       |
| Median [Min, Max] | NA [NA, NA]       | 3.00 [1.00,<br>5.00]   | 3.00 [1.00,<br>5.00] |         |
| Missing           | 29 (100%)         | 0 (0%)                 | 29 (30.9%)           |         |
| t1_AA_1           |                   |                        |                      |         |
| Mean (SD)         | NA (NA)           | 3.52 (1.13)            | 3.52 (1.13)          | 1       |
| Median [Min, Max] | NA [NA, NA]       | 4.00 [1.00,<br>5.00]   | 4.00 [1.00,<br>5.00] |         |
| Missing           | 29 (100%)         | 0 (0%)                 | 29 (30.9%)           |         |
| t1_AA_2r          |                   |                        |                      |         |
| Mean (SD)         | NA (NA)           | 3.14 (0.899)           | 3.14 (0.899)         | 1       |
| Median [Min, Max] | NA [NA, NA]       | 3.00 [1.00,<br>5.00]   | 3.00 [1.00,<br>5.00] |         |
| Missing           | 29 (100%)         | 0 (0%)                 | 29 (30.9%)           |         |
| t1_AA_3r          |                   |                        |                      |         |
| Mean (SD)         | NA (NA)           | 3.14 (0.899)           | 3.14 (0.899)         | 1       |
| Median [Min, Max] | NA [NA, NA]       | 3.00 [1.00,<br>5.00]   | 3.00 [1.00,<br>5.00] |         |
| Missing           | 29 (100%)         | 0 (0%)                 | 29 (30.9%)           |         |
| t1_ffmq_sum       |                   |                        |                      |         |
| Mean (SD)         | NA (NA)           | 27.2 (3.99)            | 27.2 (3.99)          | 1       |
| Median [Min, Max] | NA [NA, NA]       | 27.0 [16.0,<br>36.0]   | 27.0 [16.0,<br>36.0] |         |
| Missing           | 29 (100%)         | 0 (0%)                 | 29 (30.9%)           |         |
| t1_ffmq_nj        |                   |                        |                      |         |
| Mean (SD)         | NA (NA)           | 6.38 (2.87)            | 6.38 (2.87)          | 1       |
| Median [Min, Max] | NA [NA, NA]       | 6.00 [3.00,<br>14.0]   | 6.00 [3.00,<br>14.0] |         |
| Missing           | 29 (100%)         | 0 (0%)                 | 29 (30.9%)           |         |
| t1_ffmq_nr        |                   |                        |                      |         |
| Mean (SD)         | NA (NA)           | 6.49 (1.67)            | 6.49 (1.67)          | 1       |
| Median [Min, Max] | NA [NA, NA]       | 7.00 [3.00,<br>10.0]   | 7.00 [3.00,<br>10.0] |         |
| Missing           | 29 (100%)         | 0 (0%)                 | 29 (30.9%)           |         |

|                    | Control<br>(N=29) | Intervention<br>(N=65) | Overall<br>(N=94) | P-value |
|--------------------|-------------------|------------------------|-------------------|---------|
| <b>t1_ffmq_aa</b>  |                   |                        |                   |         |
| Mean (SD)          | NA (NA)           | 6.28 (1.80)            | 6.28 (1.80)       | 1       |
| Median [Min, Max]  | NA [NA, NA]       | 6.00 [2.00, 10.0]      | 6.00 [2.00, 10.0] |         |
| Missing            | 29 (100%)         | 0 (0%)                 | 29 (30.9%)        |         |
| <b>t1_ffmq_obs</b> |                   |                        |                   |         |
| Mean (SD)          | NA (NA)           | 3.52 (1.13)            | 3.52 (1.13)       | 1       |
| Median [Min, Max]  | NA [NA, NA]       | 4.00 [1.00, 5.00]      | 4.00 [1.00, 5.00] |         |
| Missing            | 29 (100%)         | 0 (0%)                 | 29 (30.9%)        |         |
| <b>t2_NJ_1r</b>    |                   |                        |                   |         |
| Mean (SD)          | NA (NA)           | 4.20 (0.905)           | 4.20 (0.905)      | 1       |
| Median [Min, Max]  | NA [NA, NA]       | 4.00 [2.00, 5.00]      | 4.00 [2.00, 5.00] |         |
| Missing            | 29 (100%)         | 0 (0%)                 | 29 (30.9%)        |         |
| <b>t2_NJ_2r</b>    |                   |                        |                   |         |
| Mean (SD)          | NA (NA)           | 4.29 (0.897)           | 4.29 (0.897)      | 1       |
| Median [Min, Max]  | NA [NA, NA]       | 5.00 [2.00, 5.00]      | 5.00 [2.00, 5.00] |         |
| Missing            | 29 (100%)         | 0 (0%)                 | 29 (30.9%)        |         |
| <b>t2_NJ_3r</b>    |                   |                        |                   |         |
| Mean (SD)          | NA (NA)           | 4.12 (0.944)           | 4.12 (0.944)      | 1       |
| Median [Min, Max]  | NA [NA, NA]       | 4.00 [2.00, 5.00]      | 4.00 [2.00, 5.00] |         |
| Missing            | 29 (100%)         | 0 (0%)                 | 29 (30.9%)        |         |
| <b>t2_NR_1</b>     |                   |                        |                   |         |
| Mean (SD)          | NA (NA)           | 3.50 (0.926)           | 3.50 (0.926)      | 1       |
| Median [Min, Max]  | NA [NA, NA]       | 4.00 [1.00, 5.00]      | 4.00 [1.00, 5.00] |         |
| Missing            | 29 (100%)         | 1 (1.5%)               | 30 (31.9%)        |         |
| <b>t2_NR_2</b>     |                   |                        |                   |         |
| Mean (SD)          | NA (NA)           | 3.22 (0.927)           | 3.22 (0.927)      | 1       |
| Median [Min, Max]  | NA [NA, NA]       | 3.00 [1.00, 5.00]      | 3.00 [1.00, 5.00] |         |
| Missing            | 29 (100%)         | 0 (0%)                 | 29 (30.9%)        |         |
| <b>t2_AA_1</b>     |                   |                        |                   |         |
| Mean (SD)          | NA (NA)           | 3.45 (1.16)            | 3.45 (1.16)       | 1       |
| Median [Min, Max]  | NA [NA, NA]       | 4.00 [1.00, 5.00]      | 4.00 [1.00, 5.00] |         |

|                   | Control<br>(N=29) | Intervention<br>(N=65) | Overall<br>(N=94) | P-value |
|-------------------|-------------------|------------------------|-------------------|---------|
| Missing           | 29 (100%)         | 0 (0%)                 | 29 (30.9%)        |         |
| t2_AA_2r          |                   |                        |                   |         |
| Mean (SD)         | NA (NA)           | 3.29 (0.879)           | 3.29 (0.879)      | 1       |
| Median [Min, Max] | NA [NA, NA]       | 3.00 [1.00, 5.00]      | 3.00 [1.00, 5.00] |         |
| Missing           | 29 (100%)         | 0 (0%)                 | 29 (30.9%)        |         |
| t2_AA_3r          |                   |                        |                   |         |
| Mean (SD)         | NA (NA)           | 3.29 (0.879)           | 3.29 (0.879)      | 1       |
| Median [Min, Max] | NA [NA, NA]       | 3.00 [1.00, 5.00]      | 3.00 [1.00, 5.00] |         |
| Missing           | 29 (100%)         | 0 (0%)                 | 29 (30.9%)        |         |
| t2_ffmq_sum       |                   |                        |                   |         |
| Mean (SD)         | NA (NA)           | 29.5 (4.53)            | 29.5 (4.53)       | 1       |
| Median [Min, Max] | NA [NA, NA]       | 29.0 [12.0, 40.0]      | 29.0 [12.0, 40.0] |         |
| Missing           | 29 (100%)         | 1 (1.5%)               | 30 (31.9%)        |         |
| t2_ffmq_nj        |                   |                        |                   |         |
| Mean (SD)         | NA (NA)           | 5.38 (2.45)            | 5.38 (2.45)       | 1       |
| Median [Min, Max] | NA [NA, NA]       | 5.00 [3.00, 12.0]      | 5.00 [3.00, 12.0] |         |
| Missing           | 29 (100%)         | 0 (0%)                 | 29 (30.9%)        |         |
| t2_ffmq_nr        |                   |                        |                   |         |
| Mean (SD)         | NA (NA)           | 6.73 (1.59)            | 6.73 (1.59)       | 1       |
| Median [Min, Max] | NA [NA, NA]       | 7.00 [2.00, 10.0]      | 7.00 [2.00, 10.0] |         |
| Missing           | 29 (100%)         | 1 (1.5%)               | 30 (31.9%)        |         |
| t2_ffmq_aa        |                   |                        |                   |         |
| Mean (SD)         | NA (NA)           | 6.58 (1.76)            | 6.58 (1.76)       | 1       |
| Median [Min, Max] | NA [NA, NA]       | 6.00 [2.00, 10.0]      | 6.00 [2.00, 10.0] |         |
| Missing           | 29 (100%)         | 0 (0%)                 | 29 (30.9%)        |         |
| t2_ffmq_obs       |                   |                        |                   |         |
| Mean (SD)         | NA (NA)           | 3.45 (1.16)            | 3.45 (1.16)       | 1       |
| Median [Min, Max] | NA [NA, NA]       | 4.00 [1.00, 5.00]      | 4.00 [1.00, 5.00] |         |
| Missing           | 29 (100%)         | 0 (0%)                 | 29 (30.9%)        |         |
| t1_MHC_1          |                   |                        |                   |         |
| Mean (SD)         | 2.72 (1.22)       | 3.68 (0.831)           | 3.38 (1.06)       | <0.001  |

|                   | Control<br>(N=29) | Intervention<br>(N=65) | Overall<br>(N=94) | P-value |
|-------------------|-------------------|------------------------|-------------------|---------|
| Median [Min, Max] | 3.00 [0, 5.00]    | 4.00 [2.00, 5.00]      | 4.00 [0, 5.00]    |         |
| t1_MHC_3          |                   |                        |                   |         |
| Mean (SD)         | 2.72 (1.28)       | 3.65 (1.07)            | 3.36 (1.21)       | 0.00248 |
| Median [Min, Max] | 3.00 [0, 5.00]    | 4.00 [1.00, 5.00]      | 4.00 [0, 5.00]    |         |
| t1_MHC_4          |                   |                        |                   |         |
| Mean (SD)         | 1.90 (1.32)       | 2.92 (1.36)            | 2.61 (1.42)       | 0.00481 |
| Median [Min, Max] | 1.00 [0, 4.00]    | 3.00 [0, 5.00]         | 3.00 [0, 5.00]    |         |
| t1_MHC_5          |                   |                        |                   |         |
| Mean (SD)         | 2.62 (1.68)       | 2.97 (1.57)            | 2.86 (1.60)       | 0.624   |
| Median [Min, Max] | 3.00 [0, 5.00]    | 3.00 [0, 5.00]         | 3.00 [0, 5.00]    |         |
| t1_MHC_11         |                   |                        |                   |         |
| Mean (SD)         | 3.48 (1.30)       | 3.83 (1.01)            | 3.72 (1.11)       | 0.374   |
| Median [Min, Max] | 4.00 [1.00, 5.00] | 4.00 [1.00, 5.00]      | 4.00 [1.00, 5.00] |         |
| t1_MHC_14         |                   |                        |                   |         |
| Mean (SD)         | 2.62 (1.72)       | 3.55 (1.37)            | 3.27 (1.54)       | 0.0238  |
| Median [Min, Max] | 3.00 [0, 5.00]    | 4.00 [0, 5.00]         | 4.00 [0, 5.00]    |         |
| t1_mhc_sum        |                   |                        |                   |         |
| Mean (SD)         | 16.1 (6.88)       | 20.6 (5.49)            | 19.2 (6.27)       | 0.00474 |
| Median [Min, Max] | 17.0 [4.00, 27.0] | 21.0 [8.00, 30.0]      | 20.0 [4.00, 30.0] |         |
| t1_mhc_swb        |                   |                        |                   |         |
| Mean (SD)         | 4.52 (2.69)       | 5.89 (2.41)            | 5.47 (2.57)       | 0.0548  |
| Median [Min, Max] | 4.00 [0, 9.00]    | 6.00 [1.00, 10.0]      | 5.50 [0, 10.0]    |         |
| t1_mhc_ewb        |                   |                        |                   |         |
| Mean (SD)         | 5.45 (2.29)       | 7.32 (1.79)            | 6.74 (2.13)       | <0.001  |
| Median [Min, Max] | 5.00 [1.00, 10.0] | 8.00 [3.00, 10.0]      | 7.00 [1.00, 10.0] |         |
| t1_mhc_pwb        |                   |                        |                   |         |
| Mean (SD)         | 6.10 (2.79)       | 7.38 (2.07)            | 6.99 (2.38)       | 0.0531  |
| Median [Min, Max] | 6.00 [1.00, 10.0] | 8.00 [2.00, 10.0]      | 8.00 [1.00, 10.0] |         |
| t2_MHC_1          |                   |                        |                   |         |
| Mean (SD)         | 2.93 (1.22)       | 3.78 (0.838)           | 3.52 (1.04)       | <0.001  |

|                   | Control<br>(N=29) | Intervention<br>(N=65) | Overall<br>(N=94) | P-value |
|-------------------|-------------------|------------------------|-------------------|---------|
| Median [Min, Max] | 3.00 [0, 5.00]    | 4.00 [2.00, 5.00]      | 4.00 [0, 5.00]    |         |
| t2_MHC_3          |                   |                        |                   |         |
| Mean (SD)         | 2.97 (1.32)       | 3.74 (1.02)            | 3.50 (1.17)       | 0.0117  |
| Median [Min, Max] | 3.00 [1.00, 5.00] | 4.00 [1.00, 5.00]      | 4.00 [1.00, 5.00] |         |
| t2_MHC_4          |                   |                        |                   |         |
| Mean (SD)         | 2.00 (1.25)       | 3.28 (1.27)            | 2.88 (1.39)       | <0.001  |
| Median [Min, Max] | 2.00 [0, 4.00]    | 3.00 [0, 5.00]         | 3.00 [0, 5.00]    |         |
| t2_MHC_5          |                   |                        |                   |         |
| Mean (SD)         | 2.90 (1.42)       | 3.14 (1.46)            | 3.06 (1.44)       | 0.755   |
| Median [Min, Max] | 3.00 [0, 5.00]    | 3.00 [0, 5.00]         | 3.00 [0, 5.00]    |         |
| t2_MHC_11         |                   |                        |                   |         |
| Mean (SD)         | 3.52 (1.33)       | 4.02 (0.944)           | 3.86 (1.09)       | 0.123   |
| Median [Min, Max] | 4.00 [1.00, 5.00] | 4.00 [1.00, 5.00]      | 4.00 [1.00, 5.00] |         |
| t2_MHC_14         |                   |                        |                   |         |
| Mean (SD)         | 2.86 (1.57)       | 3.61 (1.35)            | 3.38 (1.46)       | 0.0712  |
| Median [Min, Max] | 3.00 [0, 5.00]    | 4.00 [0, 5.00]         | 4.00 [0, 5.00]    |         |
| Missing           | 0 (0%)            | 1 (1.5%)               | 1 (1.1%)          |         |
| t2_mhc_sum        |                   |                        |                   |         |
| Mean (SD)         | 17.2 (6.95)       | 21.6 (5.52)            | 20.2 (6.31)       | 0.00666 |
| Median [Min, Max] | 18.0 [4.00, 28.0] | 22.0 [7.00, 30.0]      | 21.0 [4.00, 30.0] |         |
| Missing           | 0 (0%)            | 1 (1.5%)               | 1 (1.1%)          |         |
| t2_mhc_swb        |                   |                        |                   |         |
| Mean (SD)         | 4.90 (2.40)       | 6.42 (2.43)            | 5.95 (2.51)       | 0.0239  |
| Median [Min, Max] | 5.00 [0, 9.00]    | 7.00 [1.00, 10.0]      | 6.00 [0, 10.0]    |         |
| t2_mhc_ewb        |                   |                        |                   |         |
| Mean (SD)         | 5.90 (2.44)       | 7.52 (1.77)            | 7.02 (2.13)       | 0.00239 |
| Median [Min, Max] | 7.00 [1.00, 10.0] | 8.00 [3.00, 10.0]      | 7.50 [1.00, 10.0] |         |
| t2_mhc_pwb        |                   |                        |                   |         |
| Mean (SD)         | 6.38 (2.69)       | 7.64 (2.07)            | 7.25 (2.34)       | 0.0539  |
| Median [Min, Max] | 6.00 [1.00, 10.0] | 8.00 [2.00, 10.0]      | 8.00 [1.00, 10.0] |         |

|                   | Control<br>(N=29) | Intervention<br>(N=65) | Overall<br>(N=94)    | P-value |
|-------------------|-------------------|------------------------|----------------------|---------|
| Missing           | 0 (0%)            | 1 (1.5%)               | 1 (1.1%)             |         |
| t1_Other_Comp_1   |                   |                        |                      |         |
| Mean (SD)         | NA (NA)           | 3.78 (0.893)           | 3.78 (0.893)         | 1       |
| Median [Min, Max] | NA [NA, NA]       | 4.00 [2.00,<br>5.00]   | 4.00 [2.00,<br>5.00] |         |
| Missing           | 29 (100%)         | 0 (0%)                 | 29 (30.9%)           |         |
| t1_Other_Comp_2   |                   |                        |                      |         |
| Mean (SD)         | NA (NA)           | 3.60 (0.898)           | 3.60 (0.898)         | 1       |
| Median [Min, Max] | NA [NA, NA]       | 4.00 [1.00,<br>5.00]   | 4.00 [1.00,<br>5.00] |         |
| Missing           | 29 (100%)         | 0 (0%)                 | 29 (30.9%)           |         |
| t1_Other_Comp_3   |                   |                        |                      |         |
| Mean (SD)         | NA (NA)           | 3.98 (0.718)           | 3.98 (0.718)         | 1       |
| Median [Min, Max] | NA [NA, NA]       | 4.00 [2.00,<br>5.00]   | 4.00 [2.00,<br>5.00] |         |
| Missing           | 29 (100%)         | 0 (0%)                 | 29 (30.9%)           |         |
| t1_Other_Comp_4   |                   |                        |                      |         |
| Mean (SD)         | NA (NA)           | 3.97 (0.749)           | 3.97 (0.749)         | 1       |
| Median [Min, Max] | NA [NA, NA]       | 4.00 [2.00,<br>5.00]   | 4.00 [2.00,<br>5.00] |         |
| Missing           | 29 (100%)         | 0 (0%)                 | 29 (30.9%)           |         |
| t1_Other_Comp_5   |                   |                        |                      |         |
| Mean (SD)         | NA (NA)           | 4.06 (0.768)           | 4.06 (0.768)         | 1       |
| Median [Min, Max] | NA [NA, NA]       | 4.00 [2.00,<br>5.00]   | 4.00 [2.00,<br>5.00] |         |
| Missing           | 29 (100%)         | 0 (0%)                 | 29 (30.9%)           |         |
| t1_comp_sum       |                   |                        |                      |         |
| Mean (SD)         | NA (NA)           | 19.4 (2.89)            | 19.4 (2.89)          | 1       |
| Median [Min, Max] | NA [NA, NA]       | 19.0 [13.0,<br>25.0]   | 19.0 [13.0,<br>25.0] |         |
| Missing           | 29 (100%)         | 0 (0%)                 | 29 (30.9%)           |         |
| t1_comp_engage    |                   |                        |                      |         |
| Mean (SD)         | NA (NA)           | 7.38 (1.49)            | 7.38 (1.49)          | 1       |
| Median [Min, Max] | NA [NA, NA]       | 7.00 [4.00,<br>10.0]   | 7.00 [4.00,<br>10.0] |         |
| Missing           | 29 (100%)         | 0 (0%)                 | 29 (30.9%)           |         |
| t1_comp_act       |                   |                        |                      |         |
| Mean (SD)         | NA (NA)           | 12.0 (1.83)            | 12.0 (1.83)          | 1       |



|                   | Control<br>(N=29) | Intervention<br>(N=65) | Overall<br>(N=94) | P-value |
|-------------------|-------------------|------------------------|-------------------|---------|
| Median [Min, Max] | NA [NA, NA]       | 12.0 [8.00, 15.0]      | 12.0 [8.00, 15.0] |         |
| Missing           | 29 (100%)         | 0 (0%)                 | 29 (30.9%)        |         |
| t2_Other_Comp_1   |                   |                        |                   |         |
| Mean (SD)         | NA (NA)           | 3.55 (1.02)            | 3.55 (1.02)       | 1       |
| Median [Min, Max] | NA [NA, NA]       | 4.00 [1.00, 5.00]      | 4.00 [1.00, 5.00] |         |
| Missing           | 29 (100%)         | 0 (0%)                 | 29 (30.9%)        |         |
| t2_Other_Comp_2   |                   |                        |                   |         |
| Mean (SD)         | NA (NA)           | 3.77 (0.806)           | 3.77 (0.806)      | 1       |
| Median [Min, Max] | NA [NA, NA]       | 4.00 [2.00, 5.00]      | 4.00 [2.00, 5.00] |         |
| Missing           | 29 (100%)         | 0 (0%)                 | 29 (30.9%)        |         |
| t2_Other_Comp_3   |                   |                        |                   |         |
| Mean (SD)         | NA (NA)           | 4.05 (0.672)           | 4.05 (0.672)      | 1       |
| Median [Min, Max] | NA [NA, NA]       | 4.00 [2.00, 5.00]      | 4.00 [2.00, 5.00] |         |
| Missing           | 29 (100%)         | 0 (0%)                 | 29 (30.9%)        |         |
| t2_Other_Comp_4   |                   |                        |                   |         |
| Mean (SD)         | NA (NA)           | 4.03 (0.770)           | 4.03 (0.770)      | 1       |
| Median [Min, Max] | NA [NA, NA]       | 4.00 [2.00, 5.00]      | 4.00 [2.00, 5.00] |         |
| Missing           | 29 (100%)         | 0 (0%)                 | 29 (30.9%)        |         |
| t2_Other_Comp_5   |                   |                        |                   |         |
| Mean (SD)         | NA (NA)           | 4.16 (0.739)           | 4.16 (0.739)      | 1       |
| Median [Min, Max] | NA [NA, NA]       | 4.00 [2.00, 5.00]      | 4.00 [2.00, 5.00] |         |
| Missing           | 29 (100%)         | 1 (1.5%)               | 30 (31.9%)        |         |
| t2_comp_sum       |                   |                        |                   |         |
| Mean (SD)         | NA (NA)           | 19.6 (2.80)            | 19.6 (2.80)       | 1       |
| Median [Min, Max] | NA [NA, NA]       | 20.0 [11.0, 25.0]      | 20.0 [11.0, 25.0] |         |
| Missing           | 29 (100%)         | 1 (1.5%)               | 30 (31.9%)        |         |
| t2_comp_engage    |                   |                        |                   |         |
| Mean (SD)         | NA (NA)           | 7.32 (1.43)            | 7.32 (1.43)       | 1       |
| Median [Min, Max] | NA [NA, NA]       | 8.00 [4.00, 10.0]      | 8.00 [4.00, 10.0] |         |
| Missing           | 29 (100%)         | 0 (0%)                 | 29 (30.9%)        |         |
| t2_comp_act       |                   |                        |                   |         |

|                   | Control<br>(N=29) | Intervention<br>(N=65) | Overall<br>(N=94)    | P-value |
|-------------------|-------------------|------------------------|----------------------|---------|
| Mean (SD)         | NA (NA)           | 12.3 (1.80)            | 12.3 (1.80)          | 1       |
| Median [Min, Max] | NA [NA, NA]       | 12.0 [7.00,<br>15.0]   | 12.0 [7.00,<br>15.0] |         |
| Missing           | 29 (100%)         | 1 (1.5%)               | 30 (31.9%)           |         |
| t1_SCSS_Self_1    |                   |                        |                      |         |
| Mean (SD)         | NA (NA)           | 3.48 (0.903)           | 3.48 (0.903)         | 1       |
| Median [Min, Max] | NA [NA, NA]       | 4.00 [1.00,<br>5.00]   | 4.00 [1.00,<br>5.00] |         |
| Missing           | 29 (100%)         | 0 (0%)                 | 29 (30.9%)           |         |
| t1_SCSS_Self_2    |                   |                        |                      |         |
| Mean (SD)         | NA (NA)           | 3.37 (1.08)            | 3.37 (1.08)          | 1       |
| Median [Min, Max] | NA [NA, NA]       | 3.00 [1.00,<br>5.00]   | 3.00 [1.00,<br>5.00] |         |
| Missing           | 29 (100%)         | 0 (0%)                 | 29 (30.9%)           |         |
| t1_SCSS_Self_3    |                   |                        |                      |         |
| Mean (SD)         | NA (NA)           | 3.51 (1.12)            | 3.51 (1.12)          | 1       |
| Median [Min, Max] | NA [NA, NA]       | 4.00 [1.00,<br>5.00]   | 4.00 [1.00,<br>5.00] |         |
| Missing           | 29 (100%)         | 0 (0%)                 | 29 (30.9%)           |         |
| t1_SCSS_Self_4    |                   |                        |                      |         |
| Mean (SD)         | NA (NA)           | 3.35 (1.05)            | 3.35 (1.05)          | 1       |
| Median [Min, Max] | NA [NA, NA]       | 3.00 [1.00,<br>5.00]   | 3.00 [1.00,<br>5.00] |         |
| Missing           | 29 (100%)         | 0 (0%)                 | 29 (30.9%)           |         |
| t1_SCSS_Self_5    |                   |                        |                      |         |
| Mean (SD)         | NA (NA)           | 3.78 (0.739)           | 3.78 (0.739)         | 1       |
| Median [Min, Max] | NA [NA, NA]       | 4.00 [2.00,<br>5.00]   | 4.00 [2.00,<br>5.00] |         |
| Missing           | 29 (100%)         | 0 (0%)                 | 29 (30.9%)           |         |
| t1_SCSS_Self_6    |                   |                        |                      |         |
| Mean (SD)         | NA (NA)           | 3.89 (1.08)            | 3.89 (1.08)          | 1       |
| Median [Min, Max] | NA [NA, NA]       | 4.00 [1.00,<br>5.00]   | 4.00 [1.00,<br>5.00] |         |
| Missing           | 29 (100%)         | 0 (0%)                 | 29 (30.9%)           |         |
| t1_scs_sum        |                   |                        |                      |         |
| Mean (SD)         | NA (NA)           | 21.4 (3.96)            | 21.4 (3.96)          | 1       |
| Median [Min, Max] | NA [NA, NA]       | 22.0 [10.0,<br>29.0]   | 22.0 [10.0,<br>29.0] |         |
| Missing           | 29 (100%)         | 0 (0%)                 | 29 (30.9%)           |         |

|                        | Control<br>(N=29) | Intervention<br>(N=65) | Overall<br>(N=94) | P-value |
|------------------------|-------------------|------------------------|-------------------|---------|
| <b>t1_scs_selfkind</b> |                   |                        |                   |         |
| Mean (SD)              | NA (NA)           | 6.83 (1.71)            | 6.83 (1.71)       | 1       |
| Median [Min, Max]      | NA [NA, NA]       | 7.00 [2.00, 10.0]      | 7.00 [2.00, 10.0] |         |
| Missing                | 29 (100%)         | 0 (0%)                 | 29 (30.9%)        |         |
| <b>t2_SCSS_Self_1</b>  |                   |                        |                   |         |
| Mean (SD)              | NA (NA)           | 3.54 (0.937)           | 3.54 (0.937)      | 1       |
| Median [Min, Max]      | NA [NA, NA]       | 4.00 [1.00, 5.00]      | 4.00 [1.00, 5.00] |         |
| Missing                | 29 (100%)         | 0 (0%)                 | 29 (30.9%)        |         |
| <b>t2_SCSS_Self_2</b>  |                   |                        |                   |         |
| Mean (SD)              | NA (NA)           | 3.69 (0.934)           | 3.69 (0.934)      | 1       |
| Median [Min, Max]      | NA [NA, NA]       | 4.00 [2.00, 5.00]      | 4.00 [2.00, 5.00] |         |
| Missing                | 29 (100%)         | 0 (0%)                 | 29 (30.9%)        |         |
| <b>t2_SCSS_Self_3</b>  |                   |                        |                   |         |
| Mean (SD)              | NA (NA)           | 3.51 (0.954)           | 3.51 (0.954)      | 1       |
| Median [Min, Max]      | NA [NA, NA]       | 4.00 [1.00, 5.00]      | 4.00 [1.00, 5.00] |         |
| Missing                | 29 (100%)         | 0 (0%)                 | 29 (30.9%)        |         |
| <b>t2_SCSS_Self_4</b>  |                   |                        |                   |         |
| Mean (SD)              | NA (NA)           | 3.75 (0.926)           | 3.75 (0.926)      | 1       |
| Median [Min, Max]      | NA [NA, NA]       | 4.00 [1.00, 5.00]      | 4.00 [1.00, 5.00] |         |
| Missing                | 29 (100%)         | 1 (1.5%)               | 30 (31.9%)        |         |
| <b>t2_SCSS_Self_5</b>  |                   |                        |                   |         |
| Mean (SD)              | NA (NA)           | 3.80 (0.642)           | 3.80 (0.642)      | 1       |
| Median [Min, Max]      | NA [NA, NA]       | 4.00 [2.00, 5.00]      | 4.00 [2.00, 5.00] |         |
| Missing                | 29 (100%)         | 0 (0%)                 | 29 (30.9%)        |         |
| <b>t2_SCSS_Self_6</b>  |                   |                        |                   |         |
| Mean (SD)              | NA (NA)           | 3.92 (1.11)            | 3.92 (1.11)       | 1       |
| Median [Min, Max]      | NA [NA, NA]       | 4.00 [1.00, 5.00]      | 4.00 [1.00, 5.00] |         |
| Missing                | 29 (100%)         | 0 (0%)                 | 29 (30.9%)        |         |
| <b>t2_scs_sum</b>      |                   |                        |                   |         |
| Mean (SD)              | NA (NA)           | 22.3 (3.55)            | 22.3 (3.55)       | 1       |
| Median [Min, Max]      | NA [NA, NA]       | 23.0 [10.0, 30.0]      | 23.0 [10.0, 30.0] |         |

|                          | Control<br>(N=29) | Intervention<br>(N=65) | Overall<br>(N=94) | P-value |
|--------------------------|-------------------|------------------------|-------------------|---------|
| Missing                  | 29 (100%)         | 1 (1.5%)               | 30 (31.9%)        |         |
| <b>t2_scs_selfkind</b>   |                   |                        |                   |         |
| Mean (SD)                | NA (NA)           | 7.30 (1.57)            | 7.30 (1.57)       | 1       |
| Median [Min, Max]        | NA [NA, NA]       | 7.00 [2.00, 10.0]      | 7.00 [2.00, 10.0] |         |
| Missing                  | 29 (100%)         | 1 (1.5%)               | 30 (31.9%)        |         |
| <b>t1_Interconnected</b> |                   |                        |                   |         |
| Mean (SD)                | NA (NA)           | 4.18 (1.96)            | 4.18 (1.96)       | 1       |
| Median [Min, Max]        | NA [NA, NA]       | 5.00 [1.00, 7.00]      | 5.00 [1.00, 7.00] |         |
| Missing                  | 29 (100%)         | 0 (0%)                 | 29 (30.9%)        |         |
| <b>t2_Interconnected</b> |                   |                        |                   |         |
| Mean (SD)                | 4.14 (1.16)       | 5.20 (1.44)            | 4.87 (1.44)       | 0.00369 |
| Median [Min, Max]        | 4.00 [3.00, 7.00] | 5.00 [1.00, 7.00]      | 5.00 [1.00, 7.00] |         |
| <b>t1_Nature_Value</b>   |                   |                        |                   |         |
| Mean (SD)                | NA (NA)           | 3.25 (0.811)           | 3.25 (0.811)      | 1       |
| Median [Min, Max]        | NA [NA, NA]       | 3.00 [1.00, 4.00]      | 3.00 [1.00, 4.00] |         |
| Missing                  | 29 (100%)         | 0 (0%)                 | 29 (30.9%)        |         |
| <b>t2_Nature_Value</b>   |                   |                        |                   |         |
| Mean (SD)                | 3.24 (0.951)      | 3.08 (0.835)           | 3.13 (0.870)      | 0.7     |
| Median [Min, Max]        | 3.00 [1.00, 4.00] | 3.00 [1.00, 4.00]      | 3.00 [1.00, 4.00] |         |
| <b>t1_Trust_gen</b>      |                   |                        |                   |         |
| Mean (SD)                | NA (NA)           | 8.52 (1.26)            | 8.52 (1.26)       | 1       |
| Median [Min, Max]        | NA [NA, NA]       | 9.00 [5.00, 11.0]      | 9.00 [5.00, 11.0] |         |
| Missing                  | 29 (100%)         | 0 (0%)                 | 29 (30.9%)        |         |
| <b>t2_Trust_gen</b>      |                   |                        |                   |         |
| Mean (SD)                | 7.93 (1.67)       | 8.38 (1.44)            | 8.24 (1.52)       | 0.411   |
| Median [Min, Max]        | 8.00 [4.00, 10.0] | 9.00 [3.00, 11.0]      | 8.00 [3.00, 11.0] |         |
| <b>t1_Trust_1</b>        |                   |                        |                   |         |
| Mean (SD)                | NA (NA)           | 2.48 (1.16)            | 2.48 (1.16)       | 1       |
| Median [Min, Max]        | NA [NA, NA]       | 3.00 [1.00, 4.00]      | 3.00 [1.00, 4.00] |         |
| Missing                  | 29 (100%)         | 0 (0%)                 | 29 (30.9%)        |         |

|                   | Control<br>(N=29) | Intervention<br>(N=65) | Overall<br>(N=94) | P-value |
|-------------------|-------------------|------------------------|-------------------|---------|
| <b>t1_Trust_2</b> |                   |                        |                   |         |
| Mean (SD)         | 2.59 (0.867)      | 3.20 (1.05)            | 3.01 (1.03)       | 0.0274  |
| Median [Min, Max] | 2.00 [1.00, 4.00] | 4.00 [1.00, 4.00]      | 3.00 [1.00, 4.00] |         |
| <b>t2_Trust_1</b> |                   |                        |                   |         |
| Mean (SD)         | 2.31 (1.26)       | 2.46 (1.15)            | 2.41 (1.18)       | 0.848   |
| Median [Min, Max] | 3.00 [1.00, 4.00] | 3.00 [1.00, 4.00]      | 3.00 [1.00, 4.00] |         |
| <b>t2_Trust_2</b> |                   |                        |                   |         |
| Mean (SD)         | 2.62 (1.05)       | 3.22 (1.04)            | 3.03 (1.07)       | 0.0441  |
| Median [Min, Max] | 2.00 [1.00, 4.00] | 4.00 [1.00, 4.00]      | 3.50 [1.00, 4.00] |         |

*Note:* p-value based on two-sample t-tests

### 3 Distribution of key demographics

Figure S1. Distribution of variables pre- and post-intervention (control group). Related to STAR Methods

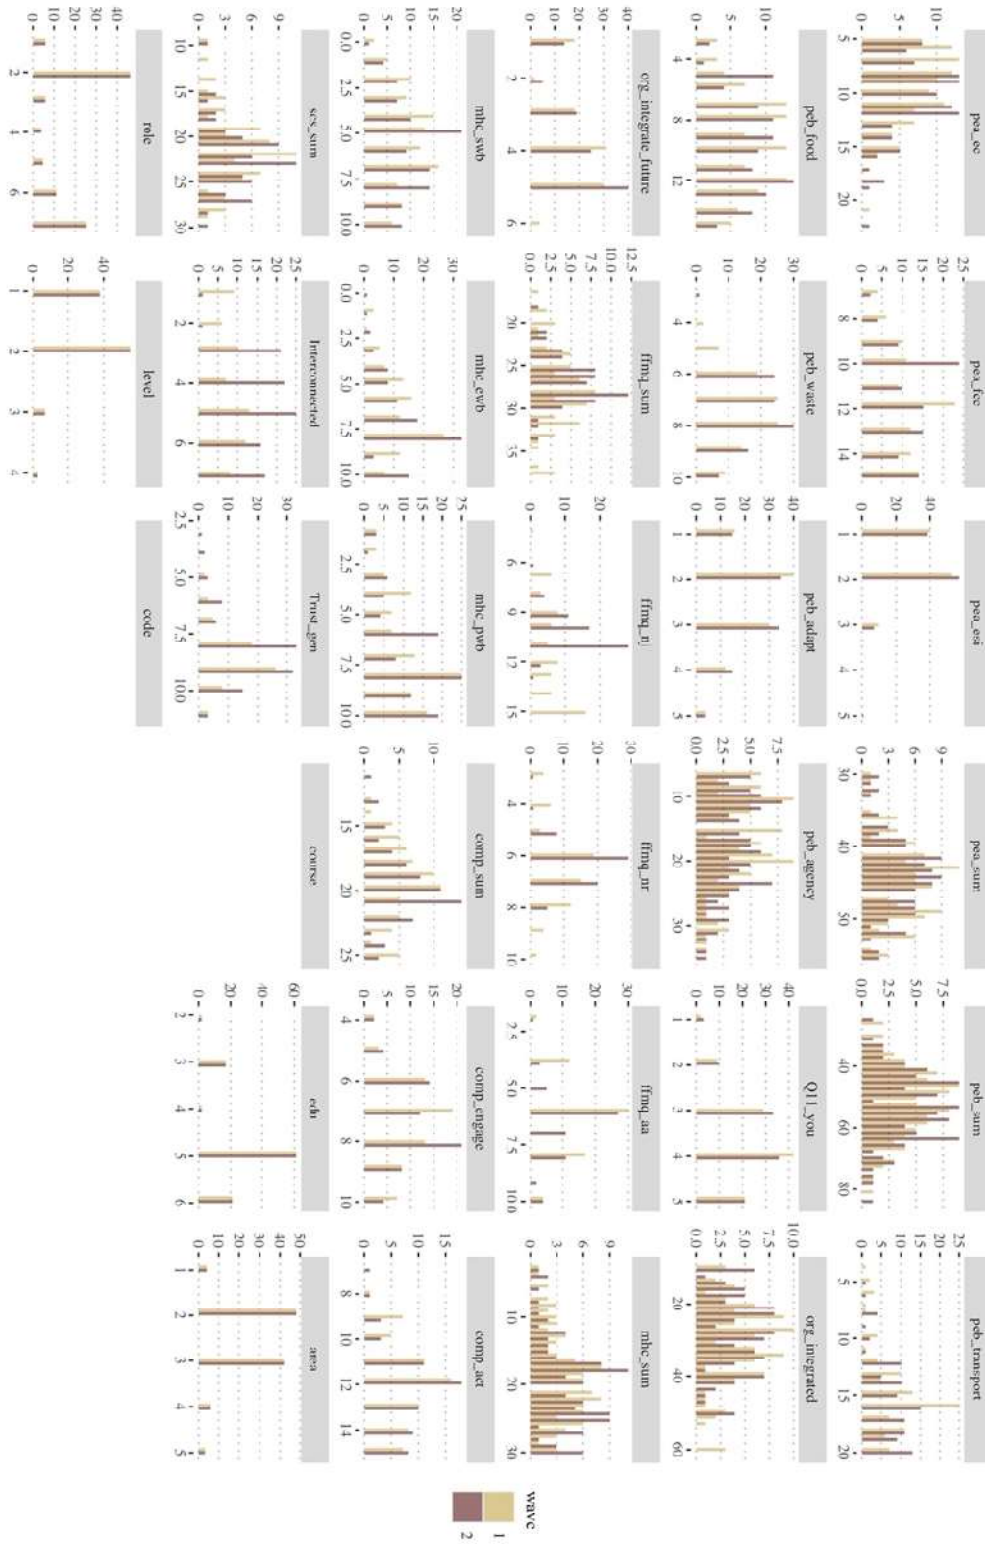

**Figure S2. Distribution of variables pre- and post-intervention (intervention group). Related to STAR Methods**

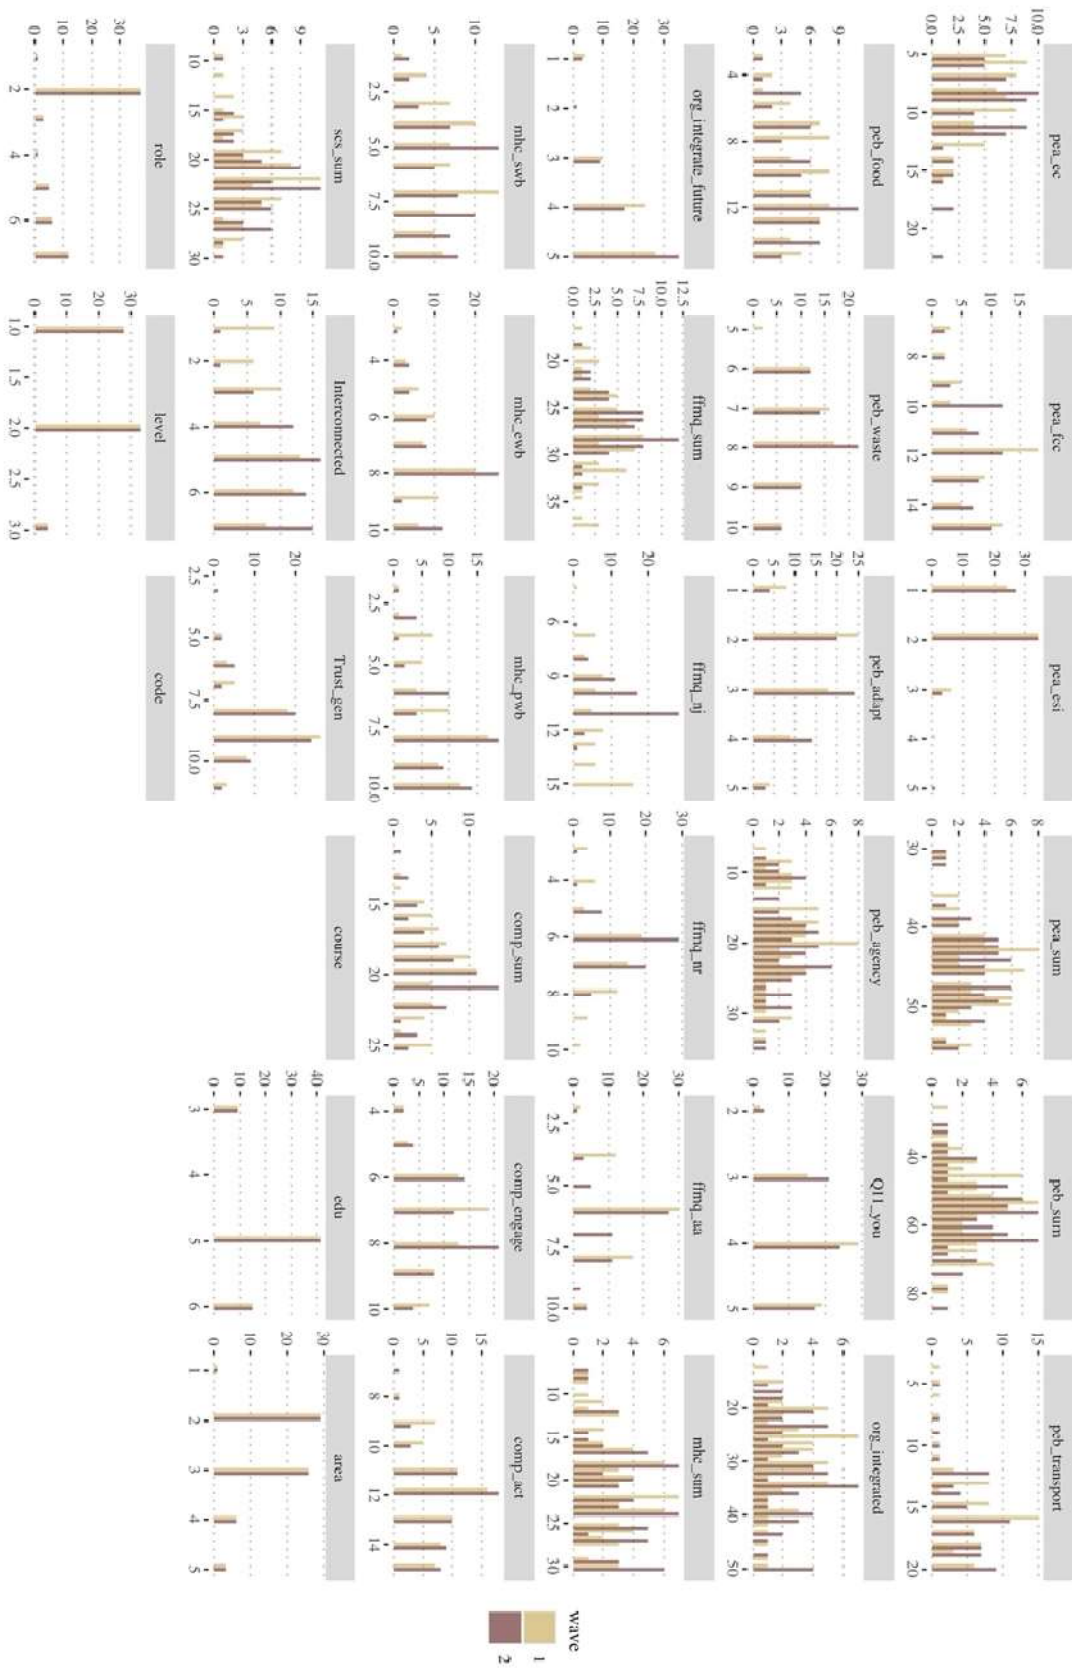

**Figure S3. Distribution of Age. Related to STAR Methods**

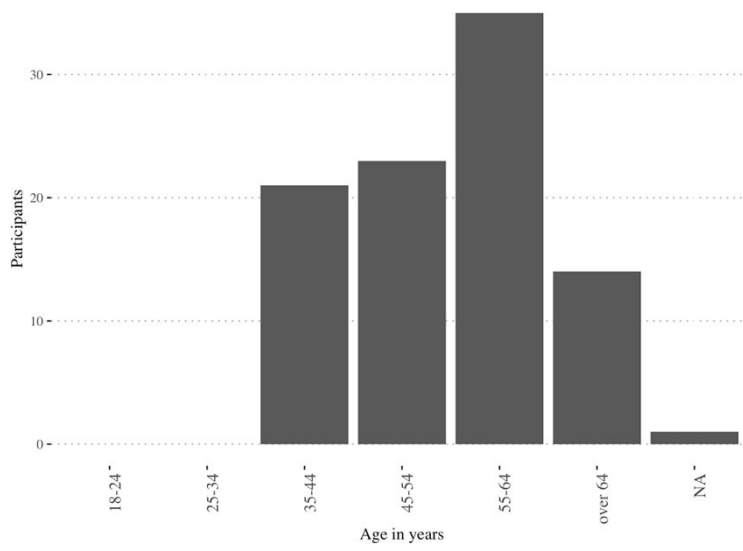

**Figure S4. Distribution of Gender. Related to STAR Methods**

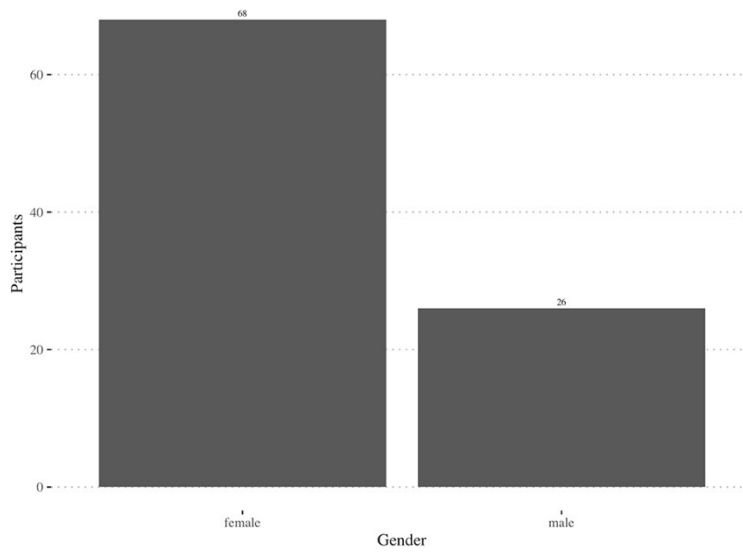



**Figure S5. Distribution of Education. Related to STAR Methods**

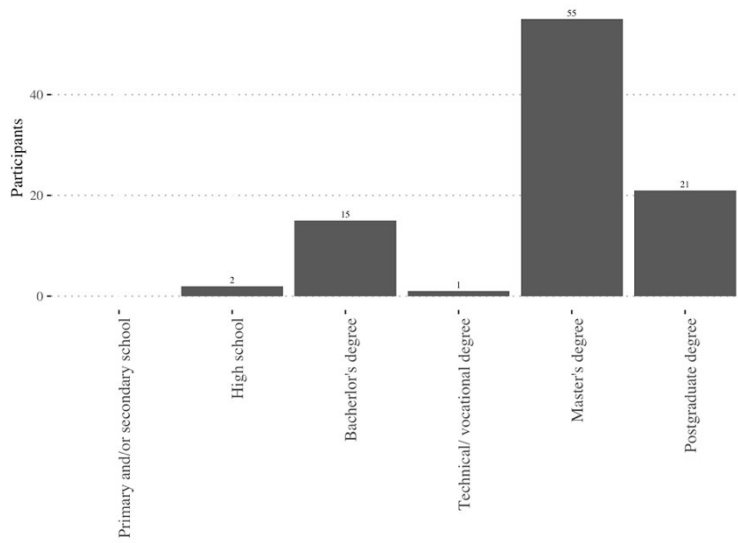

**Figure S6. Distribution of Work Area. Related to STAR Methods**

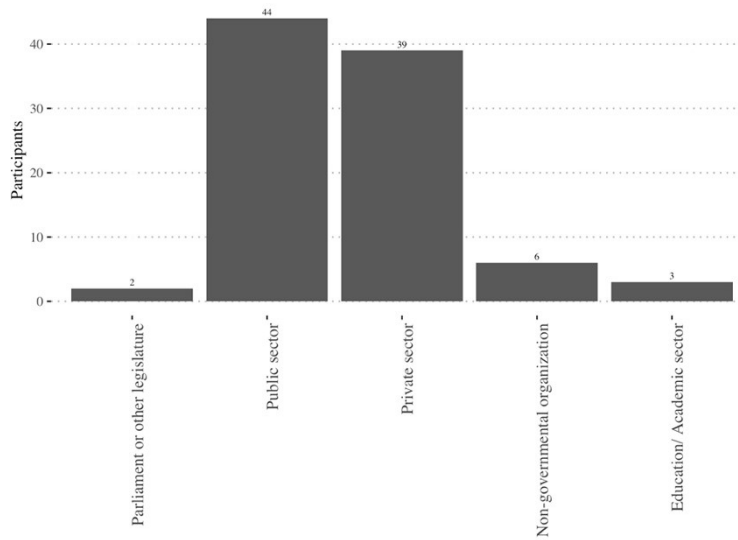

**Figure S7. Distribution of Level of Work. Related to STAR Methods**

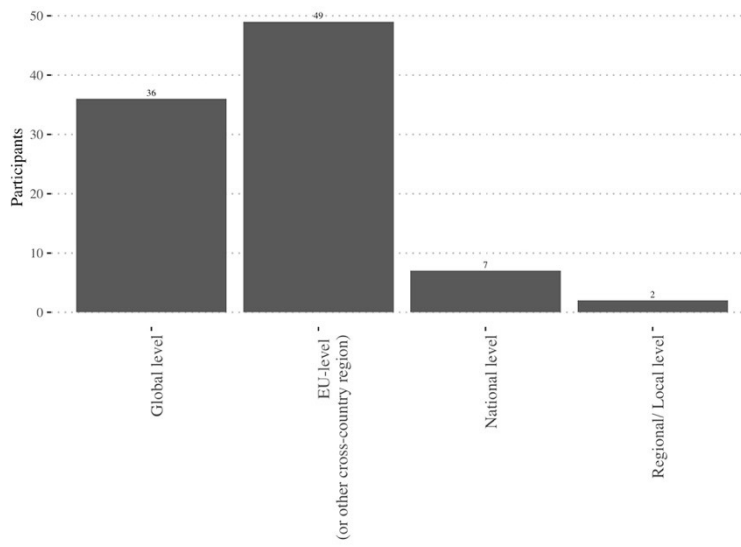

**Figure S8. Distribution of Occupation/ Role. Related to STAR Methods**

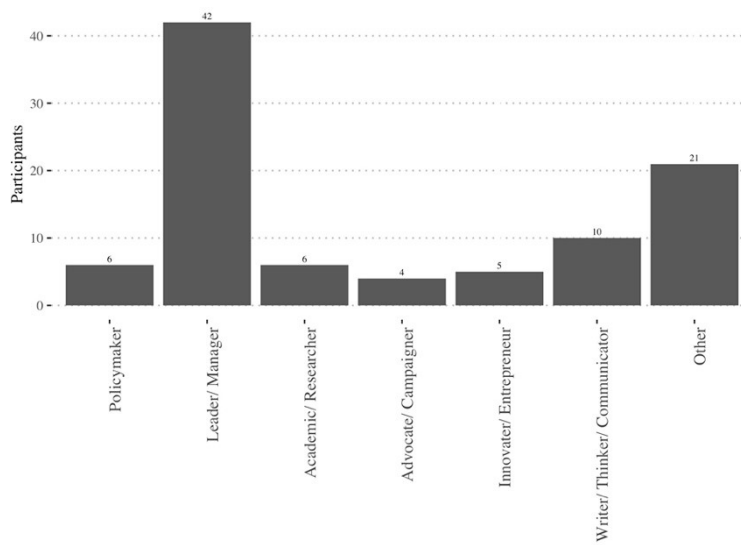

## 4 Theoretical background

**Figure S9. Potential mechanisms of change. Related to STAR Methods and Section 2 of main manuscript**

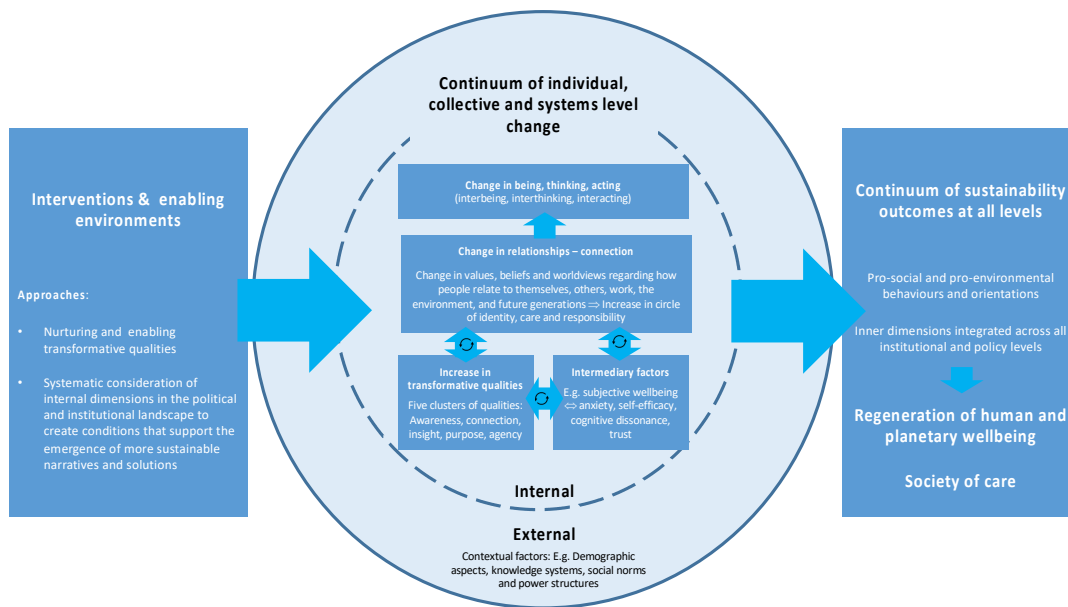

Source: <https://www.sciencedirect.com/science/article/pii/S0959378021001527?via%3Dihub>

## 5 Recruitment

### Data S2. Recruitment procedure. Related to STAR Methods

We recruited a total of five distinct groups that underwent the training. Participants consisted of high-level decision-makers working in the field of sustainability and climate change, mainly from the European Commission, the European Parliament, other European, national or local policy institutions, and a multinational private company. The training company delivering these trainings (Awaris) had already worked within these organizations and established relationships with some human resources employees, which enabled them to advertise this new pilot training through their communication channels, such as the European Union's internal learning website, and internal sustainability/leadership networks, as well as social media platforms.

### Advertisement

Courses were advertised on LinkedIn using texts similar to the following:

“We are launching our first series of online Climate Leadership programs for policy makers! You can join these FREE pilots if you send us a brief motivation. The pilots will be researched by [...]. Don't wait too long, half of the places are already taken!

FOR: policy-makers in and outside the EU Institutions. No formal leadership role required – just the willingness to lead!

DURATION: 7 online modules of around 2,5 hrs.

DATES: 7 Tuesdays or 7 Thursdays starting March 9 or 11.

### Vulnerability Screening

After expressing interest in the programme, potential participants had to complete a pre-programme screening which served two purposes: First, to assess their commitment to the programme and ability to make space for home practices and survey completion. Participants were asked to reserve 20 to 30 minutes per day for self-paced practices and commit to completing the surveys and reflections. In addition, we wanted to identify participants suffering from mental health challenges. Participants that mentioned suffering from depression or another mental health challenge within the last 12 months were contacted by a trainer to make sure they are able actively take part in the course.

List of screening items:

- In order to achieve the programme's objective, we ask for substantial participant commitment. Do you feel able to reserve around 20 to 30 minutes per day for self-paced home practice (mindfulness or micro-habit practices, walks in nature, reflection, engagement on the learning platform)?
- This pilot program is in collaboration with our research partner [...]. Participants will be asked to complete a pre-and post-survey (during workshop time) as well as short follow up surveys after each workshop module.
- In the last month, how often have you felt that you were unable to control the important things in your life?
- In the last 12 months, have you suffered from or been treated for a serious mental health challenge (e.g., depression, burnout, anxiety, addiction)?

## 6 Intervention details and comparison with other interventions

**Table S3. Comparison of the Beyond Climate Leadership Training with Mindfulness-based Trainings. Related to STAR Methods**

|                                     | Beyond Climate Leadership Training (intervention group)                                                                                                                                                                                       | Workplace Mindfulness Training (WorkingMind) (active control)                                                                                      | Typical MBIs (e.g. MBSR, MBCT)                                                                            |
|-------------------------------------|-----------------------------------------------------------------------------------------------------------------------------------------------------------------------------------------------------------------------------------------------|----------------------------------------------------------------------------------------------------------------------------------------------------|-----------------------------------------------------------------------------------------------------------|
| Duration                            | 10 weeks                                                                                                                                                                                                                                      | 10 weeks                                                                                                                                           | 8 weeks                                                                                                   |
| Total Intervention hours            |                                                                                                                                                                                                                                               | 32                                                                                                                                                 | 31                                                                                                        |
| Target Groups                       | Leaders in Organisation and Governments seeking to act on climate change and/or sustainability                                                                                                                                                | Individuals seeking to improve resilience and integrate mindfulness at work                                                                        | Individuals seeking to improve stress management, symptom management                                      |
| Focus                               | Individual wellbeing, acting on climate change, building a network to do that                                                                                                                                                                 | Individual wellbeing and performance                                                                                                               | Individual wellbeing                                                                                      |
| Number of Trainers                  | 2                                                                                                                                                                                                                                             | 2                                                                                                                                                  | 1                                                                                                         |
| Daily required formal home practice | 20-30 minutes                                                                                                                                                                                                                                 | 10 min or more                                                                                                                                     | 40 min or more                                                                                            |
| Guided Home Practice                | Yes, app-based                                                                                                                                                                                                                                | Yes, app-based                                                                                                                                     | Yes, various forms of delivery                                                                            |
| Types of formal Practices           | Body Awareness, Mindfulness, Compassion Practices, including Gratitude practice and climate specific adaptations/practices, e.g., observing emotions related to climate crisis, cultivating compassion for others                             | Body Awareness, Attention regulation, Mindfulness, compassion practices                                                                            | Body Awareness, Mindfulness, Compassion practices, yoga,                                                  |
| Types of informal practices         | Connecting to nature, e.g., mindful nature walks                                                                                                                                                                                              | Mindfulness in work life, e.g., mindful meetings                                                                                                   | Mindfulness in daily life, e.g., mindful cup of coffee                                                    |
| Psychoeducational Content           | <b>Inner dimension:</b> Body-mind processes, emotion regulation, role of trust and psychological safety<br><b>Climate science:</b> Understanding of the latest climate science, system thinking, defining opportunities for actions that link | Focus and attention at work, mindfully working with time, positive outlook, communication, collaboration and trust, self-management and leadership | Automatic pilot, awareness of body and emotions, understanding and managing stress, mindful communication |

|                                           |                                                                           |                               |    |
|-------------------------------------------|---------------------------------------------------------------------------|-------------------------------|----|
|                                           | inner and outer dimensions                                                |                               |    |
| Access to additional content              | Yes, via a self-paced learning platform                                   | Yes, via an app               | No |
| Taking social actions                     | Yes, sustainability/ climate-related actions are defined in an action lab | No                            | No |
| Collaboration with others                 | Yes, a distinct goal is to build a network of change agents               | No                            | No |
| Sustaining Mindfulness in an organisation | Developing internal champions                                             | Developing internal champions | No |

## 7 Sample overview

Table S4. Overview of Sample Structure. Related to STAR Methods

|                                  | Intervention (N=65)                       |                           |                           |                           | Control (N=29)      |                             |                                                   |                        |
|----------------------------------|-------------------------------------------|---------------------------|---------------------------|---------------------------|---------------------|-----------------------------|---------------------------------------------------|------------------------|
|                                  | EU Groups (D21EUC008) – 2 training groups | Lanxess Group (D21LAX010) | Mixed Group A (D21AWA054) | Mixed Group B (D21AWA066) | Lanxess (D21LAX083) | [...]Basecamp (D21-EUC-076) | People interested in sustainability (D21-CTR-001) | N total (intervention) |
| Number recruited (N)             | 46                                        | 19                        | 20                        | 21                        | 20                  | 74                          | 20                                                | 220 (85)               |
| Number of participants at t1 (N) | 46                                        | 19                        | 8                         | 13                        | 26                  | 52                          | 14                                                | 178 (73)               |
| Number of participants at t2 (N) | 28                                        | 18                        | 12                        | 15                        | 12                  | 23                          | 6                                                 | (58)                   |
| Match t1/t2 (N)                  | 29                                        | 17                        | 6                         | 13                        | 11                  | 14                          | 4                                                 | 94 (65)                |

## 7 Aggregated variables

**Table S5. Overview of aggregated variables. Related to STAR Methods**

| Variable                              | Wording                                                                                                                                                                                                                                                                                                                                                                                                                                                                                                                                                             |
|---------------------------------------|---------------------------------------------------------------------------------------------------------------------------------------------------------------------------------------------------------------------------------------------------------------------------------------------------------------------------------------------------------------------------------------------------------------------------------------------------------------------------------------------------------------------------------------------------------------------|
| Environmental attitudes               |                                                                                                                                                                                                                                                                                                                                                                                                                                                                                                                                                                     |
| Environmental concern                 | <p>I would feel guilty if I did not participate in actions to protect the environment/ address climate change.</p> <p>I feel morally obliged to participate in actions to protect the environment/ address climate change.</p> <p>If we continue like this, we will head for a climate/ an environmental catastrophe.</p> <p>It makes me sad when I think about the loss of species and territories due to global warming.</p>                                                                                                                                      |
| Beliefs about fighting climate change | <p>Modern science will solve our environmental problems with little change to our way of living. <b>[reverse]</b></p> <p>In order to protect the environment the country needs economic growth. <b>[reverse]</b></p> <p>We worry too much about the future of the environment and not enough about prices and jobs. <b>[reverse]</b></p>                                                                                                                                                                                                                            |
| Environmental Behavior                |                                                                                                                                                                                                                                                                                                                                                                                                                                                                                                                                                                     |
| Adapt Agency                          | <p>Take measures to be less affected/ more prepared for climate impacts.</p> <p>Take part in a social movements/ protest about an environmental issue.</p> <p>Vote or support environmentally-oriented political candidates/ parties.</p> <p>Support environmental organizations/ groups (e.g. through donations or volunteering).</p> <p>Be an active member in an environmental organization.</p> <p>Actively spread awareness (e.g. through social media or other means).</p> <p>Create initiatives that addresses specific environmental needs/ challenges.</p> |
| Transport                             | <p>Reduce car transport</p> <p>Cut down on the amount I fly (e.g. no transatlantic and short-distance flights).</p> <p>Use public transportation whenever possible.</p> <p>Walk or cycle for non-recreational purposes.</p> <p>Live car-free.</p> <p>Use a battery electric car.</p>                                                                                                                                                                                                                                                                                |
| Food                                  | <p>Adopt a vegetarian diet.</p> <p>Adopt a vegan diet.</p> <p>Buy/ eat organic food.</p> <p>Reduce material consumption (e.g. reusing, less clothes/ electronics, minimalist lifestyle).</p>                                                                                                                                                                                                                                                                                                                                                                        |
| Waste                                 | <p>Minimize waste (e.g. food, packaging).</p>                                                                                                                                                                                                                                                                                                                                                                                                                                                                                                                       |
| Mindfulness                           |                                                                                                                                                                                                                                                                                                                                                                                                                                                                                                                                                                     |
| Mindfulness: Sum                      | sum score of all items                                                                                                                                                                                                                                                                                                                                                                                                                                                                                                                                              |
| Mindfulness: Non-judgment             | <p>I think some of my emotions are bad or inappropriate and I shouldn't feel them.[reversed]</p> <p>I tell myself I shouldn't be feeling the way I'm feeling.[reversed]</p>                                                                                                                                                                                                                                                                                                                                                                                         |
| Mindfulness: Non-reacting             | <p>When I have distressing thoughts or images, I "step back" and am aware of the thought or image without getting taken over by it.</p> <p>When I have distressing thoughts or images, I am able just to notice them without reacting.</p>                                                                                                                                                                                                                                                                                                                          |



Mindfulness: Acting with awareness I do jobs or tasks automatically without being aware of what I'm doing.[reversed]  
 I find myself doing things without paying attention.[reversed]  
 I notice how foods and drinks affect my thoughts, bodily sensations, and emotions.

Mindfulness:  
 Observe

Subjective well-being  
 Subjective well-being: Sum sum score of all items  
 Subjective well-being: Social well-being that you had something important to contribute to society  
 that you belonged to a community  
 Subjective well-being: Emotional well-being happy with life  
 satisfied with life  
 Subjective well-being: Psychological well-being that you had warm and trusting relationships with others  
 that your life has a sense of direction or meaning to it

Self-Compassion:  
 Sum

Compassion for others: Sum sum score of all items  
 Compassion for others: Engage I notice and am sensitive to distress in others when it arises.  
 I am accepting, non-critical and non-judgmental of other peoples' distress.  
 Compassion for others: Act I direct attention to what is likely to be helpful to others.  
 I take the actions and do the things that will be helpful to others.  
 I express feelings of support, helpfulness and encouragement to others.

---

## 8 Correlational Analyses

**Table S6. Correlation coefficients with means, standard deviations, and confidence intervals. Related to STAR Methods and Section 3 of main manuscript**

| Variable      | M    | SD   | 1                      | 2                      | 3                      | 4                      | 5                      | 6                      | 7   | 8 | 9 | 10 | 11 | 12 | 13 | 14 | 15 | 16 | 17 | 18 |
|---------------|------|------|------------------------|------------------------|------------------------|------------------------|------------------------|------------------------|-----|---|---|----|----|----|----|----|----|----|----|----|
| 1. ffmq_sum_d | 2.28 | 4.72 |                        |                        |                        |                        |                        |                        |     |   |   |    |    |    |    |    |    |    |    |    |
| 2. mhc_sum_d  | 1.01 | 4.02 | .05<br>[-.20,<br>.30]  |                        |                        |                        |                        |                        |     |   |   |    |    |    |    |    |    |    |    |    |
| 3. comp_sum_d | 0.20 | 2.71 | .12<br>[-.13,<br>.36]  | .13<br>[-.12,<br>.36]  |                        |                        |                        |                        |     |   |   |    |    |    |    |    |    |    |    |    |
| 4. scs_sum_d  | 0.94 | 3.05 | .25<br>[-.00,<br>.47]  | .38**<br>[.14,<br>.57] | .27*<br>[.03,<br>.49]  |                        |                        |                        |     |   |   |    |    |    |    |    |    |    |    |    |
| 5. cwn_d      | 1.02 | 2.05 | -.09<br>[-.33,<br>.16] | .07<br>[-.18,<br>.31]  | .17<br>[-.08,<br>.40]  | .12<br>[-.13,<br>.35]  |                        |                        |     |   |   |    |    |    |    |    |    |    |    |    |
| 6. pea_ec_d   | 0.83 | 2.61 | .04<br>[-.22,<br>.28]  | -.00<br>[-.21,<br>.20] | .17<br>[-.09,<br>.40]  | -.14<br>[-.37,<br>.12] | -.02<br>[-.26,<br>.23] |                        |     |   |   |    |    |    |    |    |    |    |    |    |
| 7. pea_fcc_d  | 0.19 | 1.62 | .07<br>[-.18,<br>.32]  | .07<br>[-.14,<br>.27]  | -.11<br>[-.35,<br>.15] | .13<br>[-.13,<br>.37]  | .17<br>[-.09,<br>.40]  | -.04<br>[-.25,<br>.17] |     |   |   |    |    |    |    |    |    |    |    |    |
| 8. pea_wtpp_d | 0.04 | 0.76 | .22                    | -.06                   | .08                    | .01                    | .10                    | .11                    | .04 |   |   |    |    |    |    |    |    |    |    |    |

|                     |      |      |                |                |                |                |                |                |                |                |                |                |               |                |                |                |     |  |
|---------------------|------|------|----------------|----------------|----------------|----------------|----------------|----------------|----------------|----------------|----------------|----------------|---------------|----------------|----------------|----------------|-----|--|
|                     |      |      |                |                | [-.03,<br>.44] | [-.27,<br>.14] | [-.17,<br>.32] | [-.24,<br>.26] | [-.15,<br>.34] | [-.10,<br>.30] | [-.17,<br>.24] |                |               |                |                |                |     |  |
| 9. pea_wtps_d       | 0.18 | 0.83 | .25*           | .04            | .18            | -.04           | -.05           | .19            | -.00           | .15            |                |                |               |                |                |                |     |  |
|                     |      |      | [.00,<br>.47]  | [-.17,<br>.24] | [-.07,<br>.41] | [-.28,<br>.21] | [-.29,<br>.20] | [-.02,<br>.38] | [-.21,<br>.20] | [-.06,<br>.34] |                |                |               |                |                |                |     |  |
| 10. pea_esi_d       | 0.00 | 0.55 | -.07           | -.04           | .24            | .12            | -.06           | -.03           | -.11           | .05            | -.09           |                |               |                |                |                |     |  |
|                     |      |      | [-.31,<br>.18] | [-.25,<br>.16] | [-.01,<br>.46] | [-.13,<br>.35] | [-.30,<br>.19] | [-.23,<br>.18] | [-.31,<br>.10] | [-.15,<br>.25] | [-.29,<br>.11] |                |               |                |                |                |     |  |
| 11. peb_sum_d       | 1.48 | 5.96 | .16            | -.07           | .29*           | .19            | .09            | .21            | -.14           | .37**          | .07            | .29**          |               |                |                |                |     |  |
|                     |      |      | [-.10,<br>.40] | [-.28,<br>.14] | [.03,<br>.51]  | [-.08,<br>.42] | [-.17,<br>.34] | [-.00,<br>.40] | [-.34,<br>.08] | [.17,<br>.54]  | [-.14,<br>.27] | [.08,<br>.47]  |               |                |                |                |     |  |
| 12. peb_food_d      | 0.20 | 1.79 | -.14           | .07            | .12            | -.00           | .01            | .25*           | -.05           | .10            | .18            | .05            | .38**         |                |                |                |     |  |
|                     |      |      | [-.38,<br>.11] | [-.14,<br>.27] | [-.13,<br>.36] | [-.25,<br>.25] | [-.24,<br>.25] | [.05,<br>.44]  | [-.25,<br>.16] | [-.11,<br>.30] | [-.03,<br>.37] | [-.16,<br>.25] | [.19,<br>.55] |                |                |                |     |  |
| 13. peb_transport_d | 0.61 | 3.02 | .01            | -.06           | .30*           | .11            | -.03           | .12            | -.10           | .30**          | -.13           | .27*           | .72**         | .25*           |                |                |     |  |
|                     |      |      | [-.24,<br>.26] | [-.27,<br>.14] | [.06,<br>.51]  | [-.15,<br>.35] | [-.28,<br>.22] | [-.09,<br>.32] | [-.30,<br>.11] | [.10,<br>.48]  | [-.32,<br>.08] | [.06,<br>.45]  | [.61,<br>.81] | [.05,<br>.44]  |                |                |     |  |
| 14. peb_waste_d     | 0.16 | 1.30 | -.17           | .00            | .06            | -.12           | .09            | .01            | -.15           | .07            | -.00           | .17            | .38**         | -.00           | .25*           |                |     |  |
|                     |      |      | [-.41,<br>.08] | [-.21,<br>.21] | [-.19,<br>.31] | [-.36,<br>.14] | [-.16,<br>.33] | [-.20,<br>.22] | [-.34,<br>.07] | [-.13,<br>.28] | [-.21,<br>.21] | [-.03,<br>.37] | [.18,<br>.54] | [-.21,<br>.21] | [.04,<br>.43]  |                |     |  |
| 15. peb_agency_d    | 0.49 | 3.42 | .38**          | -.08           | .16            | .22            | .02            | .15            | -.04           | .23*           | .14            | .13            | .67**         | -.03           | .11            | .05            |     |  |
|                     |      |      | [.15,<br>.58]  | [-.28,<br>.13] | [-.10,<br>.39] | [-.03,<br>.44] | [-.23,<br>.26] | [-.06,<br>.34] | [-.24,<br>.17] | [.03,<br>.42]  | [-.07,<br>.33] | [-.08,<br>.32] | [.53,<br>.77] | [-.24,<br>.18] | [-.10,<br>.31] | [-.16,<br>.25] |     |  |
| 16. peb_adapt_d     | 0.17 | 1.07 | .19            | -.07           | .01            | .27*           | .13            | -.15           | .04            | .15            | .01            | .06            | .27*          | -.12           | .03            | .04            | .19 |  |

|                              |                   |      |      |      |      |      |      |       |      |      |      |      |      |      |      |      |     |      |      |     |
|------------------------------|-------------------|------|------|------|------|------|------|-------|------|------|------|------|------|------|------|------|-----|------|------|-----|
|                              |                   |      |      |      |      |      |      |       |      |      |      |      |      |      |      |      |     |      |      |     |
|                              |                   |      |      |      |      |      |      |       |      |      |      |      |      |      |      |      |     |      |      |     |
|                              |                   |      |      |      |      |      |      |       |      |      |      |      |      |      |      |      |     |      |      |     |
|                              |                   |      |      |      |      |      |      |       |      |      |      |      |      |      |      |      |     |      |      |     |
|                              |                   |      |      |      |      |      |      |       |      |      |      |      |      |      |      |      |     |      |      |     |
|                              |                   |      |      |      |      |      |      |       |      |      |      |      |      |      |      |      |     |      |      |     |
|                              |                   |      |      |      |      |      |      |       |      |      |      |      |      |      |      |      |     |      |      |     |
|                              |                   |      |      |      |      |      |      |       |      |      |      |      |      |      |      |      |     |      |      |     |
|                              |                   |      |      |      |      |      |      |       |      |      |      |      |      |      |      |      |     |      |      |     |
|                              |                   |      |      |      |      |      |      |       |      |      |      |      |      |      |      |      |     |      |      |     |
|                              |                   |      |      |      |      |      |      |       |      |      |      |      |      |      |      |      |     |      |      |     |
|                              |                   |      |      |      |      |      |      |       |      |      |      |      |      |      |      |      |     |      |      |     |
| 17. oms_you_d                | $\bar{M}$<br>0.10 | 0.75 | .08  | -.02 | -.17 | -.10 | .17  | -.00  | .03  | .08  | -.13 | -.05 | .13  | -.04 | .12  | .09  | .13 | -.03 |      |     |
|                              |                   |      |      |      |      |      |      |       |      |      |      |      |      |      |      |      |     |      |      |     |
|                              |                   |      |      |      |      |      |      |       |      |      |      |      |      |      |      |      |     |      |      |     |
|                              |                   |      |      |      |      |      |      |       |      |      |      |      |      |      |      |      |     |      |      |     |
|                              |                   |      |      |      |      |      |      |       |      |      |      |      |      |      |      |      |     |      |      |     |
|                              |                   |      |      |      |      |      |      |       |      |      |      |      |      |      |      |      |     |      |      |     |
|                              |                   |      |      |      |      |      |      |       |      |      |      |      |      |      |      |      |     |      |      |     |
|                              |                   |      |      |      |      |      |      |       |      |      |      |      |      |      |      |      |     |      |      |     |
|                              |                   |      |      |      |      |      |      |       |      |      |      |      |      |      |      |      |     |      |      |     |
|                              |                   |      |      |      |      |      |      |       |      |      |      |      |      |      |      |      |     |      |      |     |
|                              |                   |      |      |      |      |      |      |       |      |      |      |      |      |      |      |      |     |      |      |     |
|                              |                   |      |      |      |      |      |      |       |      |      |      |      |      |      |      |      |     |      |      |     |
|                              |                   |      |      |      |      |      |      |       |      |      |      |      |      |      |      |      |     |      |      |     |
|                              |                   |      |      |      |      |      |      |       |      |      |      |      |      |      |      |      |     |      |      |     |
|                              |                   |      |      |      |      |      |      |       |      |      |      |      |      |      |      |      |     |      |      |     |
|                              |                   |      |      |      |      |      |      |       |      |      |      |      |      |      |      |      |     |      |      |     |
| 18. oms_integrated_d         | $\bar{M}$<br>0.10 | 7.39 | .18  | -.09 | -.02 | .06  | -.18 | -.21* | -.06 | -.08 | -.07 | .16  | -.13 | -.11 | -.11 | -.15 | .02 | -.03 | .01  |     |
|                              |                   |      |      |      |      |      |      |       |      |      |      |      |      |      |      |      |     |      |      |     |
|                              |                   |      |      |      |      |      |      |       |      |      |      |      |      |      |      |      |     |      |      |     |
|                              |                   |      |      |      |      |      |      |       |      |      |      |      |      |      |      |      |     |      |      |     |
|                              |                   |      |      |      |      |      |      |       |      |      |      |      |      |      |      |      |     |      |      |     |
|                              |                   |      |      |      |      |      |      |       |      |      |      |      |      |      |      |      |     |      |      |     |
|                              |                   |      |      |      |      |      |      |       |      |      |      |      |      |      |      |      |     |      |      |     |
|                              |                   |      |      |      |      |      |      |       |      |      |      |      |      |      |      |      |     |      |      |     |
|                              |                   |      |      |      |      |      |      |       |      |      |      |      |      |      |      |      |     |      |      |     |
|                              |                   |      |      |      |      |      |      |       |      |      |      |      |      |      |      |      |     |      |      |     |
|                              |                   |      |      |      |      |      |      |       |      |      |      |      |      |      |      |      |     |      |      |     |
|                              |                   |      |      |      |      |      |      |       |      |      |      |      |      |      |      |      |     |      |      |     |
|                              |                   |      |      |      |      |      |      |       |      |      |      |      |      |      |      |      |     |      |      |     |
|                              |                   |      |      |      |      |      |      |       |      |      |      |      |      |      |      |      |     |      |      |     |
|                              |                   |      |      |      |      |      |      |       |      |      |      |      |      |      |      |      |     |      |      |     |
|                              |                   |      |      |      |      |      |      |       |      |      |      |      |      |      |      |      |     |      |      |     |
|                              |                   |      |      |      |      |      |      |       |      |      |      |      |      |      |      |      |     |      |      |     |
|                              |                   |      |      |      |      |      |      |       |      |      |      |      |      |      |      |      |     |      |      |     |
|                              |                   |      |      |      |      |      |      |       |      |      |      |      |      |      |      |      |     |      |      |     |
| 19. oms_integrate_personal_d | $\bar{M}$<br>0.21 | 1.13 | -.01 | .06  | .11  | .22  | .01  | -.09  | -.08 | -.01 | -.02 | .16  | .12  | -.09 | .06  | .23* | .04 | .22* | .23* | .04 |
|                              |                   |      |      |      |      |      |      |       |      |      |      |      |      |      |      |      |     |      |      |     |
|                              |                   |      |      |      |      |      |      |       |      |      |      |      |      |      |      |      |     |      |      |     |
|                              |                   |      |      |      |      |      |      |       |      |      |      |      |      |      |      |      |     |      |      |     |
|                              |                   |      |      |      |      |      |      |       |      |      |      |      |      |      |      |      |     |      |      |     |
|                              |                   |      |      |      |      |      |      |       |      |      |      |      |      |      |      |      |     |      |      |     |
|                              |                   |      |      |      |      |      |      |       |      |      |      |      |      |      |      |      |     |      |      |     |
|                              |                   |      |      |      |      |      |      |       |      |      |      |      |      |      |      |      |     |      |      |     |
|                              |                   |      |      |      |      |      |      |       |      |      |      |      |      |      |      |      |     |      |      |     |
|                              |                   |      |      |      |      |      |      |       |      |      |      |      |      |      |      |      |     |      |      |     |
|                              |                   |      |      |      |      |      |      |       |      |      |      |      |      |      |      |      |     |      |      |     |
|                              |                   |      |      |      |      |      |      |       |      |      |      |      |      |      |      |      |     |      |      |     |
|                              |                   |      |      |      |      |      |      |       |      |      |      |      |      |      |      |      |     |      |      |     |
|                              |                   |      |      |      |      |      |      |       |      |      |      |      |      |      |      |      |     |      |      |     |
|                              |                   |      |      |      |      |      |      |       |      |      |      |      |      |      |      |      |     |      |      |     |
|                              |                   |      |      |      |      |      |      |       |      |      |      |      |      |      |      |      |     |      |      |     |
|                              |                   |      |      |      |      |      |      |       |      |      |      |      |      |      |      |      |     |      |      |     |
|                              |                   |      |      |      |      |      |      |       |      |      |      |      |      |      |      |      |     |      |      |     |
|                              |                   |      |      |      |      |      |      |       |      |      |      |      |      |      |      |      |     |      |      |     |
|                              |                   |      |      |      |      |      |      |       |      |      |      |      |      |      |      |      |     |      |      |     |
|                              |                   |      |      |      |      |      |      |       |      |      |      |      |      |      |      |      |     |      |      |     |
|                              |                   |      |      |      |      |      |      |       |      |      |      |      |      |      |      |      |     |      |      |     |
|                              |                   |      |      |      |      |      |      |       |      |      |      |      |      |      |      |      |     |      |      |     |
|                              |                   |      |      |      |      |      |      |       |      |      |      |      |      |      |      |      |     |      |      |     |
|                              |                   |      |      |      |      |      |      |       |      |      |      |      |      |      |      |      |     |      |      |     |

*Note.* *M* and *SD* are used to represent mean and standard deviation, respectively. Values in square brackets indicate the 95% confidence interval for each correlation. The confidence interval is a plausible range of population correlations that could have caused the sample correlation (Cumming, 2014). \* indicates  $p < .05$ . \*\* indicates  $p < .01$ .

Figure S10. Correlation heatmap of change scores. Related to STAR Methods and Section 3 of main manuscript

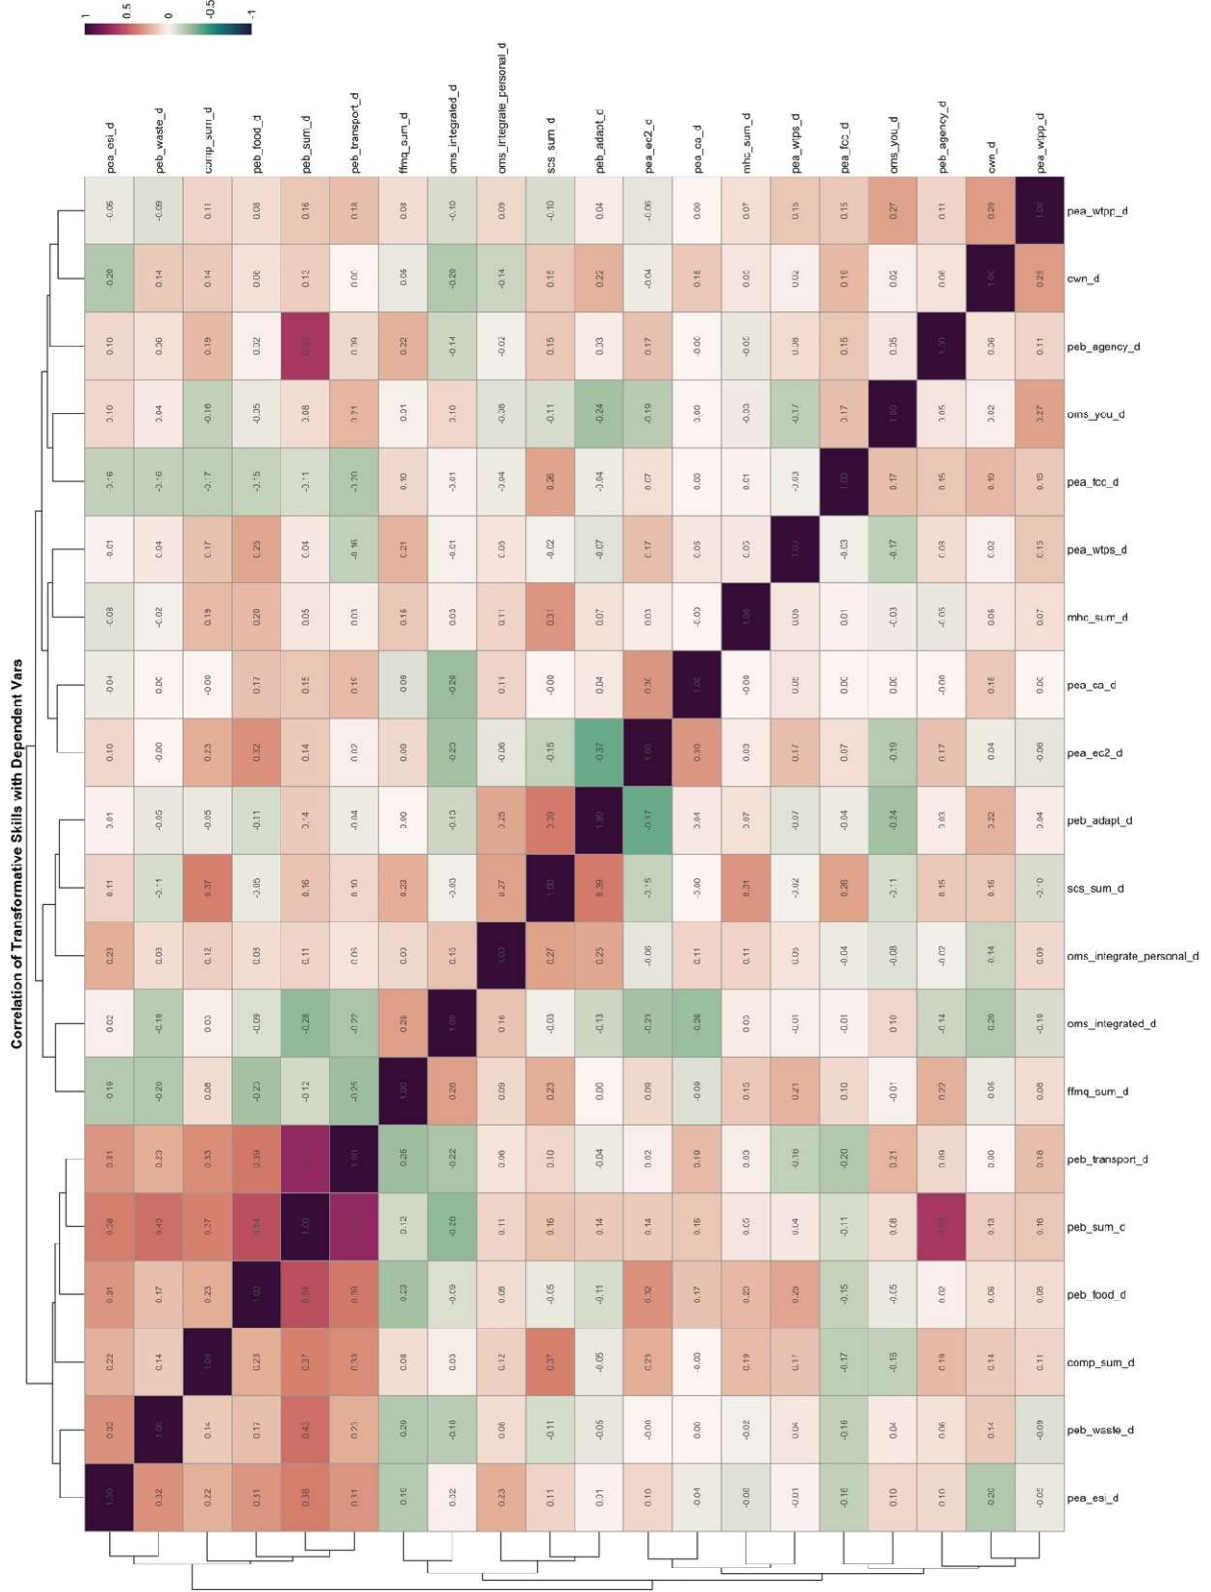

Supplement: mmc1.pdf [file mmc1.pdf]
